# Supplementary material for: Uttagsbeskattning och beskattningsinträde : En analys av förenligheten med etableringsfriheten
Source: HighWire-hosted journal article supplement (doi:10.1101/gr.145144.112), 2011-01-01
Supplement: Supp_Text_Tabs_Figs.pdf [file Supp_Text_Tabs_Figs.pdf]

## **[Supplementary Materials]**

### **The transcriptional landscape and mutational profile of lung adenocarcinoma**

#### **Authors**

Jeong-Sun Seo, Young Seok Ju, Won-Chul Lee, Jong-Yeon Shin, June Koo Lee, Thomas Bleazard, Junho Lee, Yoo Jin Jung, Jung-Oh Kim, Jung-Young Shin, Saet-Byeol Yu, Jihye Kim, Eung-Ryoung Lee, Chang-Hyun Kang, In-Kyu Park, Hwanseok Rhee, Se-Hoon Lee, Jong-Il Kim, Jin-Hyoung Kang and Young Tae Kim

# Table of Contents

## Supplementary Information

|                                                                      |   |
|----------------------------------------------------------------------|---|
| I. Cancer samples analyzed in this study .....                       | 4 |
| II. Gene expression analyses .....                                   | 5 |
| III. Statistical power of this study for fusion gene detection ..... | 6 |

## Supplementary Figures

|                                                                                                                                                                                   |    |
|-----------------------------------------------------------------------------------------------------------------------------------------------------------------------------------|----|
| Supp. Figure 1: Schematic flow chart summarizing this study .....                                                                                                                 | 7  |
| Supp. Figure 2: Number of somatic point mutations for each lung cancer specimen .....                                                                                             | 8  |
| Supp. Figure 3: Specific gene expression patterns which support the existence of <i>ALK</i> , <i>RET</i> ,<br><i>ROS1</i> and <i>PDGFRA</i> fusion genes in a cancer tissue ..... | 9  |
| Supp. Figure 4: Examples of fusion gene validation by cDNA PCR and Sanger sequencing ....                                                                                         | 10 |
| Supp. Figure 5: Recurrent skipping of exon 9 in the <i>FBLN2</i> tumor suppressor gene in lung<br>adenocarcinoma .....                                                            | 11 |
| Supp. Figure 6: The amount of smoking and number of somatic point mutations<br>In lung cancer .....                                                                               | 12 |
| Supp. Figure 7: Expression profiles of 87 lung adenocarcinomas compared to averaged gene<br>expression levels of 77 adjacent paired normal tissues .....                          | 13 |
| Supp. Figure 8: Relative expression of genes (Z-score) for 87 lung adenocarcinomas. ....                                                                                          | 14 |
| Supp. Figure 9: Distribution of read-allele frequency of somatic SNVs identified from<br>87 lung adenocarcinomas for estimating tumor purity .....                                | 15 |
| Supp. Figure 10: Difference of global gene expression levels between primary lung<br>adenocarcinomas and adjacent paired-normal tissues .....                                     | 16 |
| Supp. Figure 11: Selected cancer outlier genes (COGs) by outlier score among protein kinases<br>and genes deposited in COSMIC database .....                                      | 17 |

## Supplementary Tables

|                                                                                                                            |    |
|----------------------------------------------------------------------------------------------------------------------------|----|
| Supp. Table 1: The clinical and mutational information of 200 lung adenocarcinoma patients<br>enrolled in this study ..... | 18 |
|----------------------------------------------------------------------------------------------------------------------------|----|

|                                                                                                                                                                                  |    |
|----------------------------------------------------------------------------------------------------------------------------------------------------------------------------------|----|
| <b>Supp. Table 2:</b> Summary statistics of massively parallel sequencing experiments performed in this study. ....                                                              | 19 |
| <b>Supp. Table 3:</b> List of somatic non-synonymous and coding short-indel mutations identified from transcriptome sequencing of 87 lung adenocarcinomas .....                  | 20 |
| <b>Supp. Table 4:</b> The accuracy of somatic point mutation detection .....                                                                                                     | 21 |
| <b>Supp. Table 5:</b> Mutual exclusivity and concurrence of cancer specific alterations .....                                                                                    | 22 |
| <b>Supp. Table 6:</b> List of 45 fusion genes identified from transcriptome sequencing of 87 lung adenocarcinomas. ....                                                          | 23 |
| <b>Supp. Table 7:</b> List of 43 pairs of primers used for PCR and Sanger sequencing validation of fusion genes .....                                                            | 24 |
| <b>Supp. Table 8:</b> Mutually exclusivity of protein tyrosine kinase fusion genes and MET exon 14 skipping with known driver mutations of lung adenocarcinomas ...              | 25 |
| <b>Supp. Table 9:</b> List of 17 recurrent exon-skipping events identified from transcriptome sequencing of 87 lung adenocarcinomas .....                                        | 26 |
| <b>Supp. Table 10:</b> Expression map of 87 cancer and 77 adjacent paired-normal tissues represented in RPKM values on all reference genes.....                                  | 27 |
| <b>Supp. Table 11:</b> List of 6,719 cancer outlier genes (COGs) identified from transcriptome sequencing of 87 lung adenocarcinomas and 77 adjacent paired-normal tissues ..... | 28 |
| <b>Supp. Table 12:</b> Correlation between lymph node metastasis and somatic mutations in primary lung cancer tissues .....                                                      | 29 |
| <b>Supp. Table 13:</b> List of specific aberrations of note for 25 cancer tissues which do not harbor canonical driver mutations .....                                           | 30 |
| <b>Supp. Table 14:</b> Three subgroups of genes in differentially expressed gene analysis .....                                                                                  | 31 |

## References

|       |    |
|-------|----|
| ..... | 32 |
|-------|----|

## Supplementary Information

### I. Cancer samples analyzed in this study

*See also Supplementary Figure 1.*

We collected 200 fresh surgical specimens of primary lung adenocarcinoma from patients who underwent lobectomy at Seoul National University Hospital (n=164; from 2010 to September 2011) and Seoul St. Mary's Hospital (n=36; samples deposited in tissue bank from 2009). Twenty patients from our previous report were included in this cohort<sup>1</sup>. For each patient, we recorded diagnosis, gender, cancer stage and smoking status (Supplementary Table 1).

We performed screening genetic tests for three well-known driver mutations (exon 18-21 of *EGFR* (n=164), exon 2 of *KRAS* (n=37); and *EML4-ALK* fusion genes (n=163) (see Methods). Of the 200 cancer tissues, 110 tissues were positive for somatic mutations in one of *EGFR* (n=99), *KRAS* (n=6) and *EML4-ALK* (n=7), with two double-positive samples (1 *EGFR*<sup>+</sup>*KRAS*<sup>+</sup> and 1 *EGFR*<sup>+</sup>*EML4-ALK*<sup>+</sup>). Driver mutations in the remaining 90 samples were unknown.

We targeted these 90 samples for RNA sequencing. Excluding 3 samples which did not pass the RNA quality control, we obtained mRNA sequences from 87 lung adenocarcinomas. When available, we performed transcriptome (n=77) and whole-exome (n=76) sequencing of adjacent normal lung tissues for comparison between cancer and normal tissues (Supplementary Table 1 and 2).

## II. Gene expression analyses

Using the RNA short-read data, we calculated expression levels for all currently known RefSeq genes (n=36,742; n=22,427 with redundant genes collapsed) in RPKM units<sup>2</sup> (Supplementary Table 10). The gene expression profiles are also available at our cancer-expression browser (<http://gene.gmi.ac.kr/index.html>). Of these 22,427 genes, we found evidence for active transcription (average expression level > 1 RPKM) of 14,740 and 14,076 genes in the cancer and paired-normal tissues, respectively.

Hierarchical clustering analysis of 3,051 genes for which expression levels showed significant variance among the 164 samples categorized the genes into three subgroups: a group with generally increased abundance in cancer (Subgroup 1; n=1,031), generally decreased abundance in cancer (Subgroup 2; n=1,232) and mixed expression patterns (Subgroup 3; n=614) (Supplementary Figure 10; Supplementary Table 14). These genes clearly differentiate cancer from normal tissues. As expected, group 2 included many genes related to normal lung function, such as surfactant genes (e.g. *SFTPA1*).

To identify a subset of genes, which are extremely highly expressed not generally but exclusively in a small number of cancer tissues only (which could be undetected by the hierarchical clustering), we performed outlier analyses. We detected a total of 6,719 cancer outlier genes (COGs) from 87 cancer tissues (Supplementary Table 11). We narrowed this list down to more functionally relevant genes (Supplementary Figure 11), such as *GUCY2C*, *CDX2*, *HMGA2*, *ERN2* and *PAX7*, by comparing them with 934 putative cancer related genes (union of 462 genes deposited in COSMIC<sup>3</sup> v57 and 515 protein kinase genes<sup>4</sup>). Of these, *RET* protein tyrosine kinase (3rd strongest COG among protein kinases) was especially interesting, since fusion of this gene with *KIF5B* was recently identified as a transforming driver mutation in lung adenocarcinoma<sup>1</sup>. Of 87 cancer tissues, nine (10.3%) showed clear *RET* expression as expected<sup>1</sup>. Of these, five cancers expressed *RET* tyrosine kinase without evident fusion events.

### III. Statistical power of this study for fusion gene detection

To calculate statistical power, we applied a simple binomial model. For example, when the frequency of any specific transforming fusion gene in lung adenocarcinoma is 0.015 ( $p=0.015$ ), the probability that the fusion gene is not included in our cohort ( $n=200$ ) can be calculated as follows:

Probability (# of specimens with the fusion gene ( $r$ ) = 0)

$$\begin{aligned} &= nCr \times p^r \times (1-p)^{(n-r)} \\ &= {}_{200}C_0 \times (0.015)^0 \times (0.985)^{200} \\ &= 0.0487 \end{aligned}$$

Therefore, we expect the probability that the fusion gene is included in our cohort is approximately 95.1%.

$$\begin{aligned} \text{Power} &= 1 - P \\ &= 1 - 0.0487 \\ &= 0.9513 \end{aligned}$$

## Supplementary Figures

**Supplementary Figure 1.** Schematic flow chart summarizing this study.

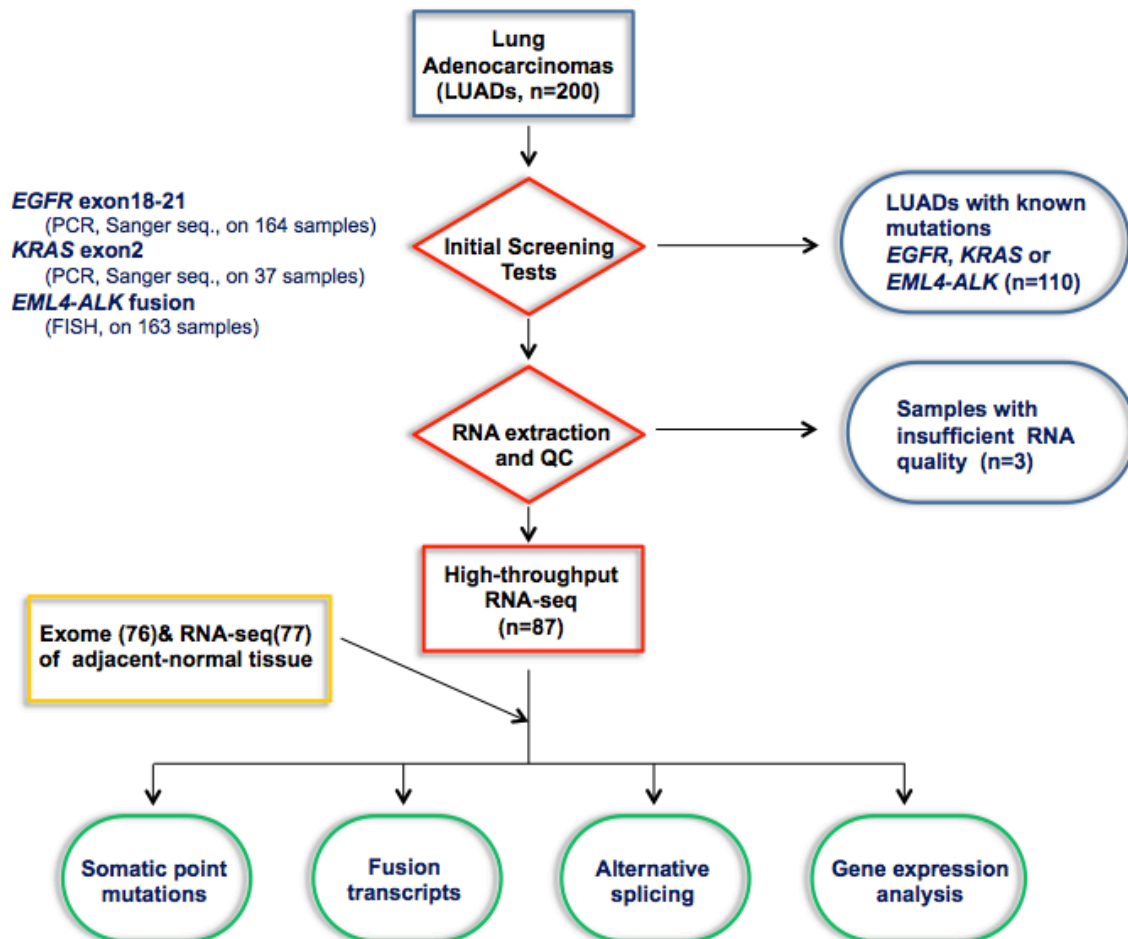

**Supplementary Figure 2.** Number of somatic point mutations for each lung cancer specimen.

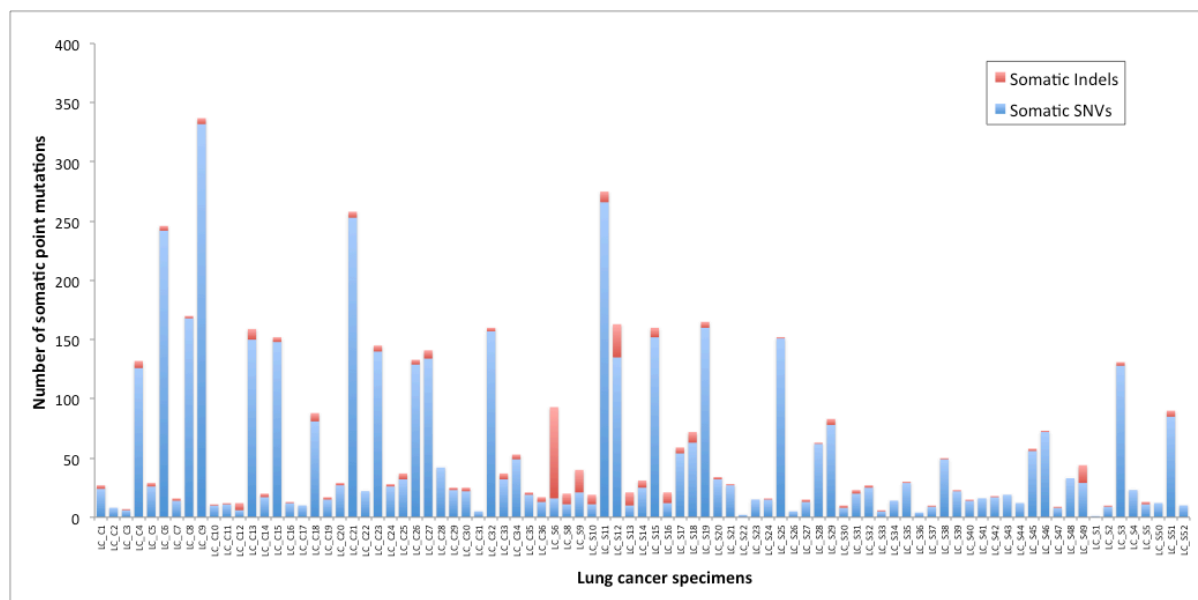



**Supplementary Figure 3.** Specific gene expression patterns which support the existence of *ALK*, *RET*, *ROS1* and *PDGFRA* fusion genes in a cancer tissue.

(a) *EML4-ALK*

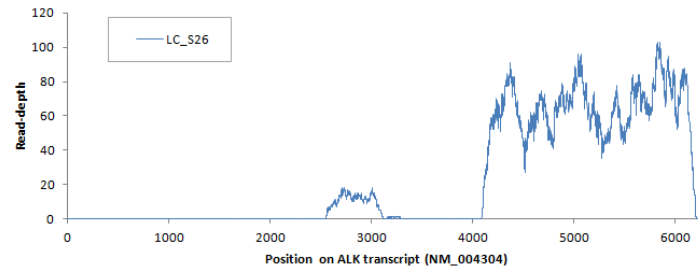

(b) *KIF5B-RET*

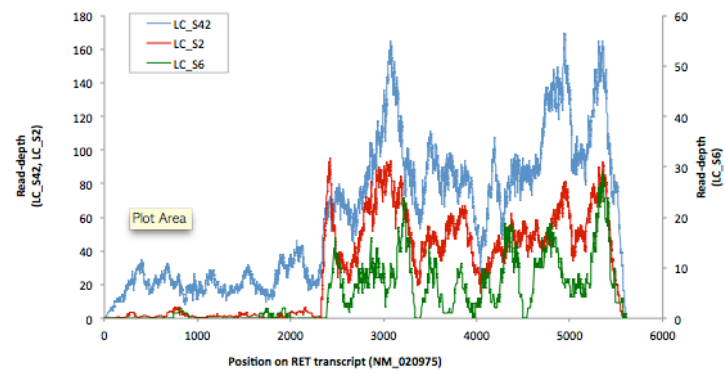

(c) *ROS1* fusions

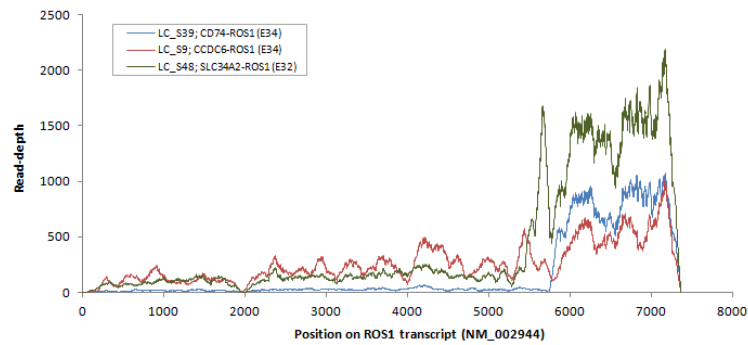

(d) *SCAF11-PDGFR*

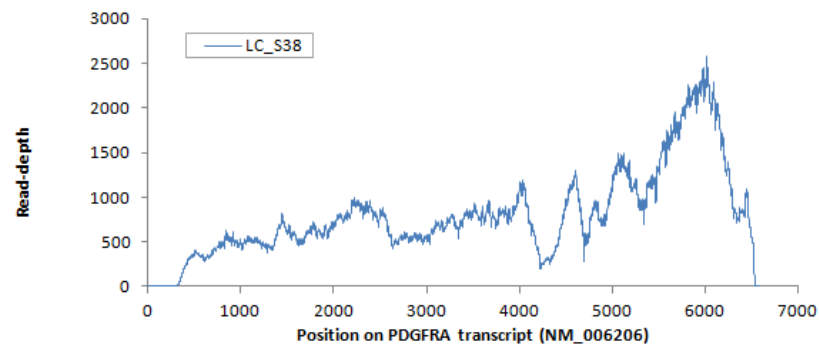

**Supplementary Figure 4.** Examples of fusion gene validation by cDNA PCR and Sanger sequencing.

(a) *AXL-MBIP*

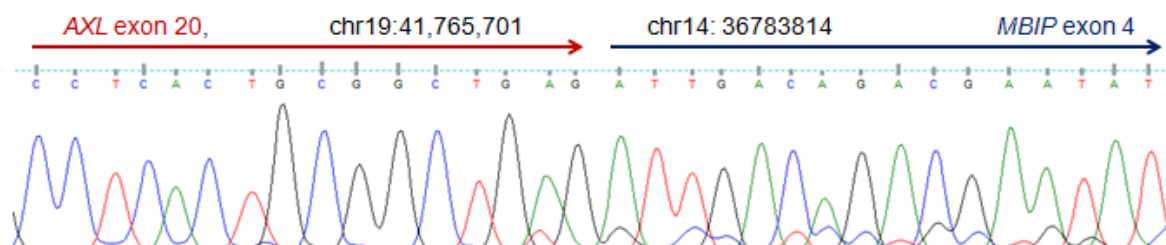

(b) *FGFR2-CIT*

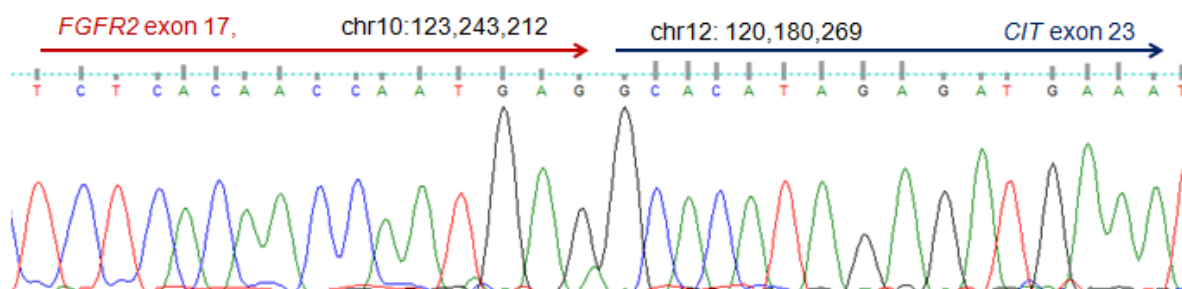

(c) *SCAF11-PDGFR*

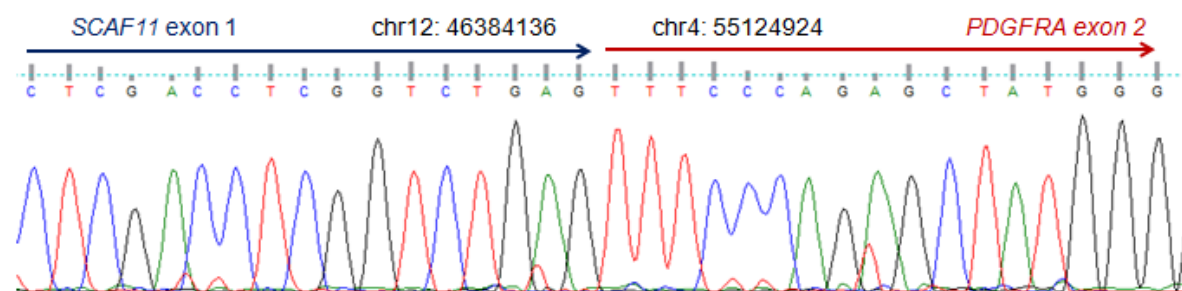

**Supplementary Figure 5.** Recurrent skipping of exon 9 in the *FBLN2* tumor suppressor gene in lung adenocarcinoma.

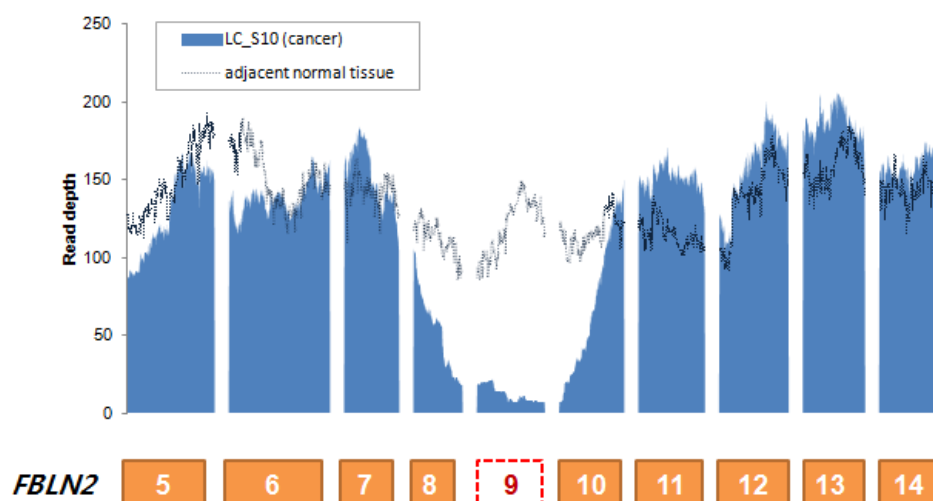

**Supplementary Figure 6.** The amount of smoking and number of somatic point mutations in lung cancer.

We split smokers into two-groups (heavy- and light-smokers) using a cutoff of 40 pack-years. Heavy-smokers harbored significantly more somatic point mutations than light-smokers and never-smokers (on average, 102.5, 31.3 and 20.6 somatic point mutations were detected from the cancer genomes of heavy-smokers, light-smokers and never-smokers, respectively). Of the 40 smokers studied, the information on the amount of smoking (pack year) was available for 23 cancer patients.

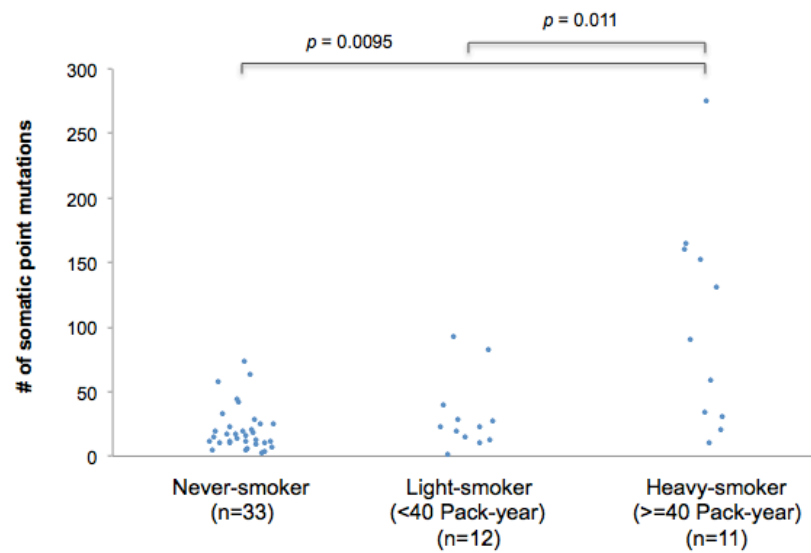

**Supplementary Figure 7.** Expression profiles of 87 lung adenocarcinomas compared to averaged gene expression levels of 77 adjacent paired normal tissues.

*Seo\_SuppFig7A.pdf*

*Seo\_SuppFig7B.pdf*

*Seo\_SuppFig7C.pdf*

*Seo\_SuppFig7D.pdf*

*Seo\_SuppFig7E.pdf*

Depicted below is a preview of the full version.

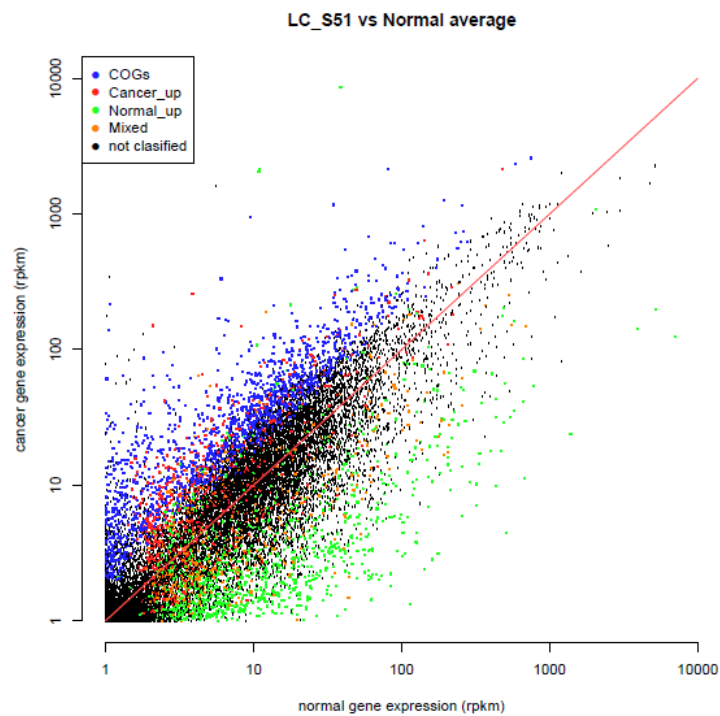

**Supplementary Figure 8.** Relative expression of genes (Z-score) for 87 lung adenocarcinomas.

Seo\_SuppFig8A.pdf  
Seo\_SuppFig8B.pdf  
Seo\_SuppFig8C.pdf  
Seo\_SuppFig8D.pdf  
Seo\_SuppFig8E.pdf  
Seo\_SuppFig8F.pdf  
Seo\_SuppFig8G.pdf  
Seo\_SuppFig8H.pdf  
Seo\_SuppFig8I.pdf

Depicted below is a preview of the full version.

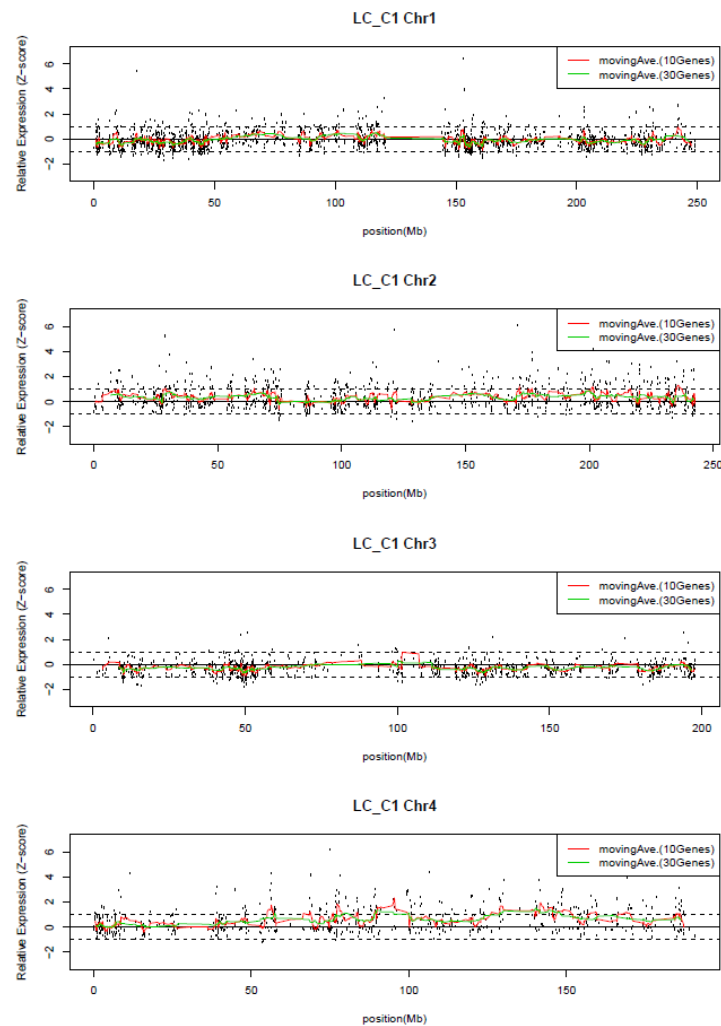

**Supplementary Figure 9.** Distribution of read-allele frequency of somatic SNVs identified from 87 lung adenocarcinomas for estimating tumor purity.

We calculated read-allele frequency (RAF) of cancer RNA sequencing for somatic SNVs. Of the 4,607 somatic SNVs identified, we assessed 4,283 SNVs with sufficient read-depth ( $\geq 10$ ) to calculate RAFs with accuracy. The median RAF is 0.40, which suggests that the approximate purity of the major cancer clone is ~ 80%. For detailed calculations, please see Supplemental Methods #2, Ju YS *et al.*, *Genome Research* (2012) 22(3): 436-45 (Ref. 1).

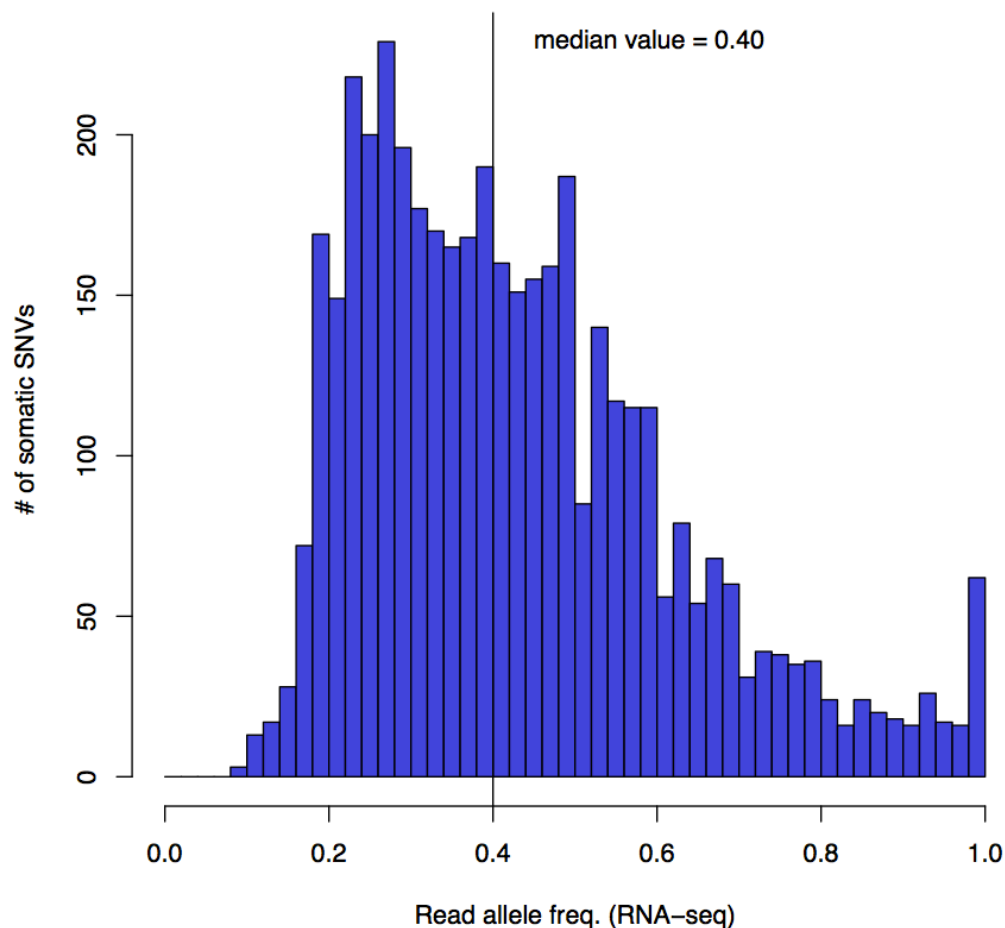

**Supplementary Figure 10.** Difference of global gene expression levels between primary lung adenocarcinomas (n=87) and adjacent paired-normal tissues (n=77). Vertical bar: Increased abundance in cancer (red; Cancer-up); decreased abundance in cancer (green; Cancer-down); and mixed patterns (orange). Horizontal bar: lung adenocarcinomas (red); paired-normal tissues (blue).

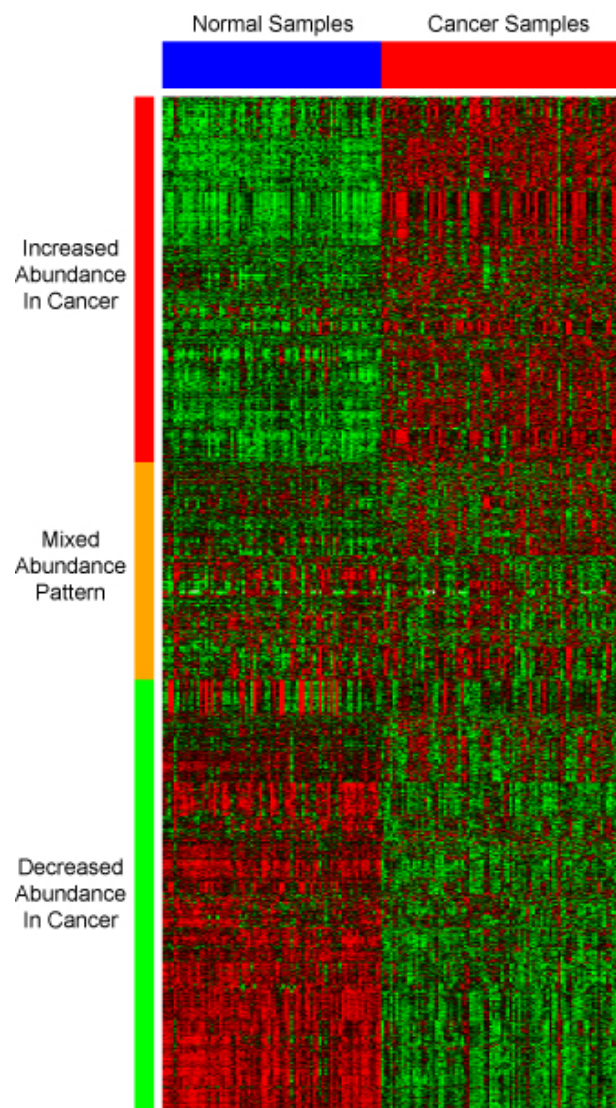



**Supplementary Figure 11.** Selected cancer outlier genes (COGs) by outlier score among protein kinases and genes deposited in COSMIC database. The number in the brackets shows the number of cancer specimens (out of 87 specimens), which carry the gene as an expression outlier.

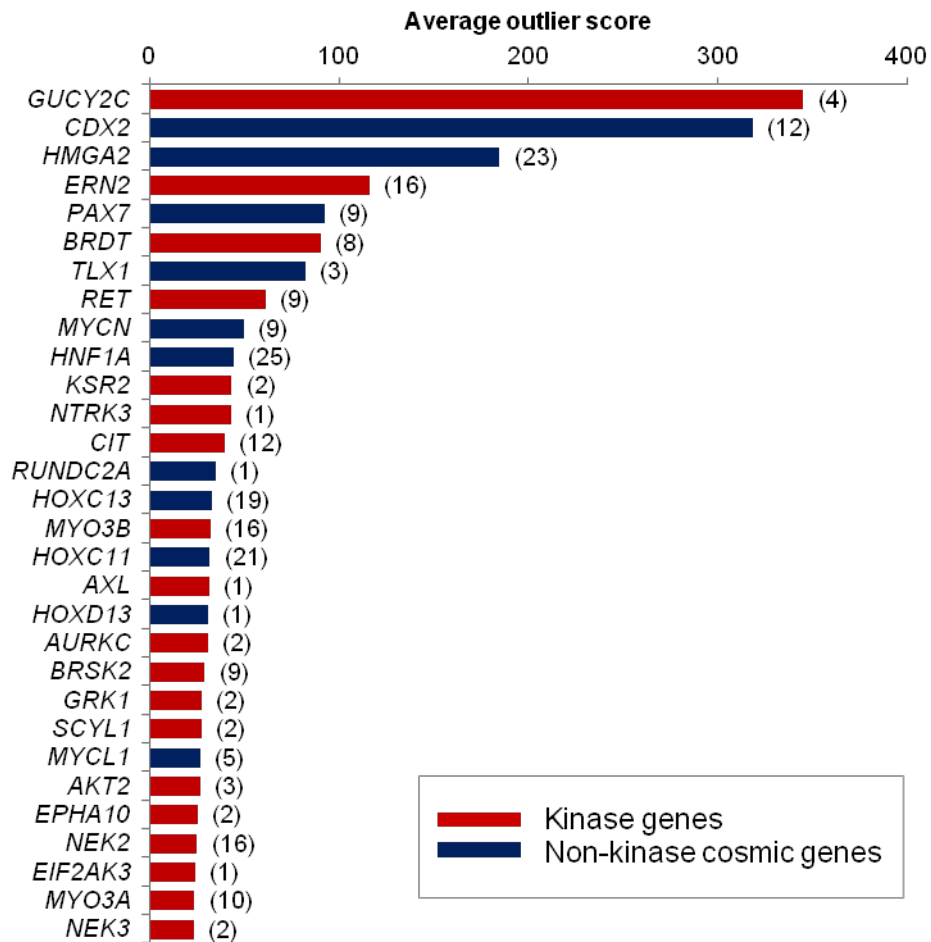

## Supplementary Tables

**Supplementary Table 1.** The clinical and mutational information of 200 lung adenocarcinoma patients enrolled in this study.

*Seo\_SuppTable1\_r.xls*

Depicted below is a preview of the full version.

| Publication | Age_at | Gender<br>(1=male, 2=female) | Smoking_status<br>(0=never smoker, 1=smoker, 2=unknown) | Stage | Cancer_RNA_Quality<br>(0=poor, 1=good; NE=Not Examined) | Cancer_RNAseq<br>(0=no, 1=yes) | Normal_RNAseq<br>(0=no, 1=yes) | Normal_ExomeSeq<br>(0=no, 1=yes) | Genetic test at hospital                                                     |                                                                |                                                                  |                                            | FUSION<br>(1=No, 2=YES) | LN Mets<br>(0=No, 1=Yes) | Potential Driver Mutations |
|-------------|--------|------------------------------|---------------------------------------------------------|-------|---------------------------------------------------------|--------------------------------|--------------------------------|----------------------------------|------------------------------------------------------------------------------|----------------------------------------------------------------|------------------------------------------------------------------|--------------------------------------------|-------------------------|--------------------------|----------------------------|
|             |        |                              |                                                         |       |                                                         |                                |                                |                                  | EGFR e18-e21<br>(NE=not Examined, 0=no mutation, des=mutation, des=mutation) | EGFR Summary<br>(NE=not Examined, 0=no mutation, des=mutation) | KRAS<br>(NE=not Examined, wt=wildtype, description, description) | EML4-ALK<br>(NE=not Examined, 0=no, 1=yes) |                         |                          |                            |
| LC_C1       | 54     | 1                            | 1                                                       | 1A    | 1                                                       | 1                              | 1                              | 1                                | NE                                                                           | NE                                                             | NE                                                               | NE                                         | 1                       | 0                        | EGFR exon 19 microdeletion |
| LC_C2       | 51     | 1                            | 2                                                       | 2B    | 1                                                       | 1                              | 1                              | 1                                | NE                                                                           | NE                                                             | NE                                                               | NE                                         | 1                       | 0                        |                            |
| LC_C3       | 65     | 2                            | 0                                                       | 1A    | 1                                                       | 1                              | 1                              | 1                                | NE                                                                           | NE                                                             | NE                                                               | NE                                         | 1                       | 0                        | EGFR L858R                 |
| LC_C4       | 52     | 1                            | 0                                                       | 3B    | 1                                                       | 1                              | 0                              | 0                                | NE                                                                           | NE                                                             | NE                                                               | NE                                         | 1                       | 1                        | KRAS G13D                  |
| LC_C5       | 68     | 1                            | 3                                                       | 3A    | 1                                                       | 1                              | 1                              | 1                                | NE                                                                           | NE                                                             | NE                                                               | NE                                         | 1                       | 1                        | KRAS G12C                  |
| LC_C6       | 38     | 1                            | 2                                                       | 2B    | 1                                                       | 1                              | 0                              | 0                                | NE                                                                           | NE                                                             | NE                                                               | NE                                         | 1                       | 0                        |                            |
| LC_C7       | 81     | 1                            | 1                                                       | 1A    | 1                                                       | 1                              | 1                              | 1                                | NE                                                                           | NE                                                             | NE                                                               | NE                                         | 1                       | 0                        |                            |
| LC_C8       | 85     | 1                            | 1                                                       | 1B    | 1                                                       | 1                              | 0                              | 0                                | NE                                                                           | NE                                                             | NE                                                               | NE                                         | 1                       | 0                        |                            |
| LC_C9       | 71     | 1                            | 1                                                       | 1B    | 1                                                       | 1                              | 1                              | 1                                | NE                                                                           | NE                                                             | NE                                                               | NE                                         | 1                       | 0                        |                            |
| LC_C10      | 58     | 2                            | 0                                                       | 2A    | 1                                                       | 1                              | 1                              | 1                                | NE                                                                           | NE                                                             | NE                                                               | NE                                         | 1                       | 1                        | EGFR exon 19 microdeletion |
| LC_C11      | 63     | 2                            | 0                                                       | 1A    | 1                                                       | 1                              | 1                              | 1                                | NE                                                                           | NE                                                             | NE                                                               | NE                                         | 2                       | 0                        | EGFR exon 19 microdeletion |
| LC_C12      | 66     | 1                            | 3                                                       | 1B    | 1                                                       | 1                              | 1                              | 1                                | NE                                                                           | NE                                                             | NE                                                               | NE                                         | 2                       | 0                        | EGFR L858R                 |
| LC_C13      | 72     | 1                            | 2                                                       | 2B    | 1                                                       | 1                              | 0                              | 0                                | NE                                                                           | NE                                                             | NE                                                               | NE                                         | 1                       | 0                        | KRAS G12V                  |
| LC_C14      | 50     | 2                            | 2                                                       | 3A    | 1                                                       | 1                              | 1                              | 1                                | NE                                                                           | NE                                                             | NE                                                               | NE                                         | 1                       | 1                        | EGFR exon 19 microdeletion |
| LC_C15      | 60     | 1                            | 2                                                       | 1B    | 1                                                       | 1                              | 0                              | 0                                | NE                                                                           | NE                                                             | NE                                                               | NE                                         | 2                       | 0                        | MET exon 14 skipping       |
| LC_C16      | 54     | 2                            | 0                                                       | 1A    | 1                                                       | 1                              | 1                              | 1                                | NE                                                                           | NE                                                             | NE                                                               | NE                                         | 2                       | 0                        | EGFR L858R                 |
| LC_C17      | 64     | 2                            | 0                                                       | 1A    | 1                                                       | 1                              | 1                              | 1                                | NE                                                                           | NE                                                             | NE                                                               | NE                                         | 2                       | 0                        | MET exon 14 skipping       |
| LC_C18      | 68     | 2                            | 1                                                       | 1B    | 1                                                       | 1                              | 1                              | 1                                | NE                                                                           | NE                                                             | NE                                                               | NE                                         | 1                       | 0                        |                            |
| LC_C19      | 40     | 2                            | 0                                                       | 4     | 1                                                       | 1                              | 1                              | 1                                | NE                                                                           | NE                                                             | NE                                                               | NE                                         | 1                       | 0                        | NRAS Q61K                  |
| LC_C20      | 65     | 1                            | 1                                                       | 1A    | 1                                                       | 1                              | 1                              | 1                                | NE                                                                           | NE                                                             | NE                                                               | NE                                         | 1                       | 0                        | EGFR exon 19 microdeletion |

**Supplementary Table 2.** Summary statistics of massively parallel sequencing experiments performed in this study.

*Seo\_SuppTable2.xls*

Depicted below is a preview of the full version.

| Sample | Cancer RNA-Seq |                    |                         | Normal RNA-Seq |                    |                         | Normal whole-exome sequencing            |                                |                                 |
|--------|----------------|--------------------|-------------------------|----------------|--------------------|-------------------------|------------------------------------------|--------------------------------|---------------------------------|
|        | # of all reads | # of aligned reads | # of aligned reads (bp) | # of all reads | # of aligned reads | # of aligned reads (bp) | # of exon-aligned reads (bp) (on-target) | Total coverage (X) (on-target) | % of exons captured (on-target) |
| LC_C1  | 77,494,486     | 47,470,889         | 4,794,559,789           | 45,688,760     | 30,723,033         | 3,103,026,333           | 2,178,031,360                            | 47.33                          | 98.48                           |
| LC_C2  | 107,215,548    | 63,982,363         | 6,462,218,663           | 84,044,300     | 56,980,300         | 5,755,010,300           | 1,401,862,209                            | 30.46                          | 97.76                           |
| LC_C3  | 83,152,108     | 52,466,930         | 5,299,159,930           | 73,116,392     | 49,425,295         | 4,991,954,795           | 1,685,976,503                            | 36.64                          | 97.77                           |
| LC_C4  | 92,656,104     | 53,906,608         | 5,444,567,408           | -              | -                  | -                       | -                                        | -                              | -                               |
| LC_C5  | 78,018,264     | 50,172,918         | 5,067,464,718           | 64,131,160     | 42,834,089         | 4,326,242,989           | 2,385,520,838                            | 51.84                          | 98.7                            |
| LC_C6  | 92,725,904     | 56,470,698         | 5,703,540,498           | -              | -                  | -                       | -                                        | -                              | -                               |
| LC_C7  | 91,073,182     | 55,521,230         | 5,607,644,230           | 71,647,042     | 50,101,529         | 5,060,254,429           | 2,537,090,617                            | 55.13                          | 98.78                           |
| LC_C8  | 94,479,946     | 59,514,604         | 6,010,975,004           | -              | -                  | -                       | -                                        | -                              | -                               |
| LC_C9  | 74,519,406     | 46,621,418         | 4,708,763,218           | 85,984,544     | 60,050,324         | 6,065,082,724           | 1,747,785,171                            | 37.98                          | 97.93                           |
| LC_C10 | 90,885,746     | 53,008,298         | 5,353,838,098           | 57,904,006     | 38,302,163         | 3,868,518,463           | 1,379,192,060                            | 29.97                          | 97.45                           |
| LC_C11 | 72,691,004     | 38,326,688         | 3,870,995,488           | 60,069,120     | 39,730,037         | 4,012,733,737           | 1,390,026,595                            | 30.2                           | 97.22                           |
| LC_C12 | 67,503,666     | 35,156,178         | 3,550,773,978           | 54,398,896     | 37,732,658         | 3,810,998,458           | 1,218,193,317                            | 26.47                          | 97.1                            |
| LC_C13 | 63,150,052     | 34,157,339         | 3,449,891,239           | -              | -                  | -                       | -                                        | -                              | -                               |
| LC_C14 | 79,154,436     | 43,445,511         | 4,387,996,611           | 66,595,976     | 45,186,779         | 4,563,864,679           | 2,019,292,321                            | 43.88                          | 98.31                           |
| LC_C15 | 120,345,132    | 65,067,364         | 6,571,803,764           | -              | -                  | -                       | -                                        | -                              | -                               |
| LC_C16 | 77,198,774     | 39,908,939         | 4,030,802,839           | 60,758,862     | 40,073,167         | 4,047,389,867           | 1,405,362,092                            | 30.54                          | 97.68                           |
| LC_C17 | 75,140,824     | 40,726,871         | 4,113,413,971           | 66,540,006     | 44,966,927         | 4,541,659,627           | 2,405,400,933                            | 52.27                          | 98.49                           |
| LC_C18 | 87,207,996     | 46,837,953         | 4,730,633,253           | 72,409,094     | 51,842,913         | 5,236,134,213           | 1,572,378,178                            | 34.17                          | 97.98                           |
| LC_C19 | 79,215,512     | 43,241,275         | 4,367,368,775           | 75,620,208     | 51,101,497         | 5,161,251,197           | 2,602,075,094                            | 56.54                          | 98.75                           |
| LC_C20 | 73,241,042     | 41,503,737         | 4,191,877,437           | 69,621,988     | 47,893,928         | 4,837,286,728           | 1,334,532,896                            | 29                             | 96.54                           |
| LC_C21 | 66,062,856     | 35,515,426         | 3,587,058,026           | 77,754,752     | 51,871,683         | 5,239,039,983           | 1,602,111,576                            | 34.81                          | 97.13                           |

**Supplementary Table 3.** List of somatic non-synonymous and coding short-indel mutations identified from transcriptome sequencing of 87 lung adenocarcinomas.

*Seo\_SuppTable3.xls*

*There are three spreadsheets inside, for somatic non-synonymous mutations, CDS short-indel mutations and gene-based dataset.*

Depicted below is a preview of the full version.

|     |           |           |            |             |              |                   |        |                                                   |                                                    |                                  |                                   |                          | Somatic SNV candidates<br>#var_reads_in_CaRNAseq    #wt_reads_in_CaRNAseq    #var_reads_in_NormalExomeSeq    #wt_reads_in_NormalExomeSeq<br>(-), no_variant_detected; (N), notSequenced |        |        |        |          |          |        |        |        |         |         |         |         |          |          |         |         |         |         |         |         |         |
|-----|-----------|-----------|------------|-------------|--------------|-------------------|--------|---------------------------------------------------|----------------------------------------------------|----------------------------------|-----------------------------------|--------------------------|-----------------------------------------------------------------------------------------------------------------------------------------------------------------------------------------|--------|--------|--------|----------|----------|--------|--------|--------|---------|---------|---------|---------|----------|----------|---------|---------|---------|---------|---------|---------|---------|
| chr | pos       | wt_allele | var_allele | annotation  | wt_AminoAcid | variant_AminoAcid | Blosum | is_in_COSMIC(v56)<br>(LungCA)<br>(ND=notDetected) | is_in_COSMIC(v56)<br>(OtherCA)<br>(ND=notDetected) | is_in<br>dbSNP1<br>32zoom<br>mon | is_on<br>segmental<br>duplication | #<br>samples<br>involved | LC_ C1                                                                                                                                                                                  | LC_ C2 | LC_ C3 | LC_ C4 | LC_ C5   | LC_ C6   | LC_ C7 | LC_ C8 | LC_ C9 | LC_ C10 | LC_ C11 | LC_ C12 | LC_ C13 | LC_ C14  | LC_ C15  | LC_ C16 | LC_ C17 | LC_ C18 | LC_ C19 | LC_ C20 | LC_ C21 | LC_ C22 |
| 1   | 899,541   | T         | C          | CDS:KLHL1   | V            | A                 | 0      | ND                                                | ND                                                 | no                               | no                                | 1                        | -                                                                                                                                                                                       | -      | -      | -      | -        | 3(4)(-)  | -      | -      | -      | -       | -       | -       | -       | -        | -        | -       | -       | -       | -       | -       | -       | -       |
| 1   | 906,512   | G         | A          | CDS:PLEKH   | R            | Q                 | 1      | ND                                                | ND                                                 | no                               | no                                | 1                        | -                                                                                                                                                                                       | -      | -      | -      | -        | -        | -      | -      | -      | -       | -       | -       | -       | -        | -        | -       | -       | -       | -       | -       | -       | -       |
| 1   | 978,600   | G         | T          | CDS:AGRN    | G            | W                 | -2     | ND                                                | ND                                                 | no                               | no                                | 1                        | -                                                                                                                                                                                       | -      | -      | -      | 5(12)(-) | -        | -      | -      | -      | -       | -       | -       | -       | -        | -        | -       | -       | -       | -       | -       | -       | -       |
| 1   | 1,192,679 | G         | A          | CDS:UBE2J   | H            | Y                 | 2      | ND                                                | ND                                                 | no                               | no                                | 1                        | -                                                                                                                                                                                       | -      | -      | -      | -        | -        | -      | -      | -      | -       | -       | -       | -       | -        | -        | -       | -       | -       | -       | -       | -       | -       |
| 1   | 1,271,848 | G         | A          | CDS:DVL1    | R            | C                 | -3     | ND                                                | ND                                                 | no                               | no                                | 1                        | -                                                                                                                                                                                       | -      | -      | -      | -        | -        | -      | -      | -      | -       | -       | -       | -       | 27(3)(-) | -        | -       | -       | -       | -       | -       | -       | -       |
| 1   | 1,355,905 | G         | T          | CDS:LOC44   | L            | M                 | 2      | ND                                                | ND                                                 | no                               | no                                | 1                        | -                                                                                                                                                                                       | -      | -      | -      | -        | -        | -      | -      | -      | -       | -       | -       | -       | -        | -        | -       | -       | -       | -       | -       | -       | -       |
| 1   | 1,563,912 | C         | T          | CDS:MIB2.U  | P            | L                 | -3     | ND                                                | ND                                                 | no                               | no                                | 1                        | -                                                                                                                                                                                       | -      | -      | -      | -        | -        | -      | -      | -      | -       | -       | -       | -       | -        | -        | -       | -       | -       | -       | -       | -       | -       |
| 1   | 1,564,571 | G         | A          | CDS:MIB2.U  | C            | Y                 | -2     | ND                                                | ND                                                 | no                               | no                                | 1                        | -                                                                                                                                                                                       | -      | -      | -      | -        | -        | -      | -      | -      | -       | -       | -       | -       | -        | -        | -       | -       | -       | -       | -       | -       | -       |
| 1   | 1,886,912 | C         | T          | CDS:PRK CZ  | T            | M                 | -1     | ND                                                | ND                                                 | no                               | no                                | 1                        | -                                                                                                                                                                                       | -      | -      | -      | -        | -        | -      | -      | -      | -       | -       | -       | -       | -        | -        | -       | -       | -       | -       | -       | -       | -       |
| 1   | 2,116,739 | A         | G          | CDS:C1orf86 | M            | T                 | -1     | ND                                                | ND                                                 | no                               | no                                | 1                        | -                                                                                                                                                                                       | -      | -      | -      | -        | -        | -      | -      | -      | -       | -       | -       | -       | -        | -        | -       | -       | -       | -       | -       | -       | -       |
| 1   | 2,125,258 | G         | A          | CDS:C1orf86 | P            | L                 | -3     | ND                                                | ND                                                 | no                               | no                                | 1                        | -                                                                                                                                                                                       | -      | -      | -      | -        | -        | -      | -      | -      | -       | -       | -       | -       | -        | -        | -       | -       | -       | -       | -       | -       | -       |
| 1   | 2,426,310 | G         | A          | CDS:FLCH2   | D            | N                 | 1      | ND                                                | ND                                                 | no                               | no                                | 1                        | -                                                                                                                                                                                       | -      | -      | -      | -        | -        | -      | -      | -      | -       | -       | -       | -       | -        | -        | -       | -       | -       | -       | -       | -       | -       |
| 1   | 2,444,426 | C         | A          | CDS:PANK4   | R            | L                 | -2     | ND                                                | ND                                                 | no                               | no                                | 1                        | -                                                                                                                                                                                       | -      | -      | -      | -        | -        | -      | -      | -      | -       | -       | -       | -       | -        | -        | -       | -       | -       | -       | -       | -       | -       |
| 1   | 2,452,304 | C         | A          | CDS:PANK4   | C            | F                 | -2     | ND                                                | ND                                                 | no                               | no                                | 1                        | -                                                                                                                                                                                       | -      | -      | -      | -        | -        | -      | -      | -      | -       | -       | -       | -       | -        | -        | -       | -       | -       | -       | -       | -       | -       |
| 1   | 2,518,387 | G         | T          | CDS:C1orf93 | E            | D                 | 2      | ND                                                | ND                                                 | no                               | no                                | 1                        | -                                                                                                                                                                                       | -      | -      | -      | -        | -        | -      | -      | -      | -       | -       | -       | -       | -        | -        | -       | -       | -       | -       | -       | -       | -       |
| 1   | 3,328,220 | G         | A          | CDS:PRDM1   | E            | K                 | 1      | ND                                                | ND                                                 | no                               | no                                | 1                        | -                                                                                                                                                                                       | -      | -      | -      | -        | -        | -      | -      | -      | -       | -       | -       | -       | -        | 5(13)(-) | -       | -       | -       | -       | -       | -       | -       |
| 1   | 3,380,086 | G         | T          | CDS:ARHG    | R            | S                 | -1     | ND                                                | ND                                                 | no                               | no                                | 1                        | -                                                                                                                                                                                       | -      | -      | -      | -        | -        | -      | -      | -      | -       | -       | -       | -       | -        | -        | -       | -       | -       | -       | -       | -       | -       |
| 1   | 3,413,341 | G         | A          | CDS:MEGF6   | P            | L                 | -3     | ND                                                | ND                                                 | no                               | no                                | 1                        | -                                                                                                                                                                                       | -      | -      | -      | -        | -        | -      | -      | -      | -       | -       | -       | -       | -        | -        | -       | -       | -       | -       | -       | -       | -       |
| 1   | 3,548,900 | C         | T          | CDS:WDR8    | E            | K                 | 1      | ND                                                | ND                                                 | no                               | no                                | 1                        | -                                                                                                                                                                                       | -      | -      | -      | -        | 5(13)(-) | -      | -      | -      | -       | -       | -       | -       | -        | -        | -       | -       | -       | -       | -       | -       | -       |

**Supplementary Table 4.** The accuracy of somatic point mutation detection.

The cancer whole-exomes of patient LC\_C5 and LC\_C21 were sequenced to estimate the accuracy of RNA-seq in the detection of somatic point mutations. We concluded that somatic mutations were validated when  $\geq 1$  read supporting the corresponding mutant allele was detected in the exome sequences. Somatic mutations include somatic SNVs and indels. The numbers in parenthesis are for somatic indels.

| Specimens | # Somatic mutations | # somatic mutations                       |           |         |
|-----------|---------------------|-------------------------------------------|-----------|---------|
|           |                     | covered $\geq 1$ x<br>in cancer exome seq | Validated | Rate    |
| LC_C5     | 29                  | 28                                        | 24        | 85.7%   |
|           | (3)                 | (3)                                       | (2)       | (66.6%) |
| LC_C21    | 258                 | 252                                       | 226       | 89.6%   |
|           | (5)                 | (5)                                       | (4)       | (80%)   |
| Total     | 287                 | 280                                       | 250       | 89.2%   |
|           | (8)                 | (8)                                       | (6)       | (75.0%) |

**Supplementary Table 5.** Mutual exclusivity and concurrence of cancer specific alterations.

Every cancer alteration (somatic point mutations, fusion genes (fusions) and MET ES (exon skipping) in Figure 1 was considered in this testing

*Seo\_SuppTable5\_new.xls*

Depicted below is a preview of the full version.

| Gene1   | Gene2    | wt_wt | mut_wt | wt_mut | mut_mut | Fisher's p-value | Pearson's correlation |
|---------|----------|-------|--------|--------|---------|------------------|-----------------------|
| SETD2   | BRAF     | Pai   | 2      | 0      | 2       | 0.00160385       | 0.69873836            |
| AKAP9   | JAK2     | 83    | 1      | 1      | 2       | 0.00238691       | 0.6547619             |
| SMARCA4 | MYST4    | 83    | 1      | 1      | 2       | 0.00238691       | 0.6547619             |
| EGFR    | KRAS     | 47    | 22     | 18     | 0       | 0.00457092       | -0.2971436            |
| ALPK3   | RNF213   | 82    | 1      | 2      | 2       | 0.00473607       | 0.56007437            |
| SETD2   | BAP1     | 82    | 2      | 1      | 2       | 0.00473607       | 0.56007437            |
| CIC     | MYH9     | 82    | 2      | 1      | 2       | 0.00473607       | 0.56007437            |
| NOTCH2  | CDC42BPB | 81    | 3      | 1      | 2       | 0.00783056       | 0.49465787            |
| NOTCH2  | BAP1     | 81    | 3      | 1      | 2       | 0.00783056       | 0.49465787            |
| TP53    | NRAS     | 65    | 19     | 0      | 3       | 0.01452899       | 0.32483762            |
| TP53    | JAK2     | 65    | 19     | 0      | 3       | 0.01452899       | 0.32483762            |
| NOTCH2  | RNF213   | 80    | 3      | 2      | 2       | 0.01529048       | 0.41740702            |
| KRAS    | SETD2    | 68    | 15     | 1      | 3       | 0.02666972       | 0.29432826            |
| CDKN2A  | STK11    | 84    | 1      | 1      | 1       | 0.0457097        | 0.48823529            |
| TP53    | CIC      | 64    | 19     | 1      | 3       | 0.04825699       | 0.25107822            |
| EGFR    | fusions  | 55    | 22     | 10     | 0       | 0.05940816       | -0.209657             |
| MLL2    | BRAF     | 83    | 2      | 1      | 1       | 0.06816359       | 0.39134545            |
| CDKN2A  | ARID1A   | 83    | 1      | 2      | 1       | 0.06816359       | 0.39134545            |
| MET     | SMARCA4  | 83    | 1      | 2      | 1       | 0.06816359       | 0.39134545            |
| MET     | LMTK2    | 83    | 1      | 2      | 1       | 0.06816359       | 0.39134545            |
| MET     | MYST4    | 83    | 1      | 2      | 1       | 0.06816359       | 0.39134545            |
| MET     | CDC42BPB | 83    | 1      | 2      | 1       | 0.06816359       | 0.39134545            |
| MET     | MAP3K4   | 83    | 1      | 2      | 1       | 0.06816359       | 0.39134545            |
| NACA    | LMTK2    | 82    | 2      | 2      | 1       | 0.10105194       | 0.30952381            |

**Supplementary Table 6.** List of 45 fusion genes identified from transcriptome sequencing of 87 lung adenocarcinomas.

*Seo\_SuppTable6\_r.xls*

Depicted below is a preview of the full version.

| Index | Donor Gene     | Acceptor Gene   | Chromosome (Donor;Acceptor) | # samples observed | Distance (Mb)    | Sample observed | Donor Breakpoint (RNA) | Donor protein sequence near breakpoint | Acceptor Breakpoint (RNA) | Acceptor protein sequence near breakpoint | Co-occurrence of other driver mutation |
|-------|----------------|-----------------|-----------------------------|--------------------|------------------|-----------------|------------------------|----------------------------------------|---------------------------|-------------------------------------------|----------------------------------------|
| 1     | <i>EML4</i>    | <i>ALK</i>      | chr2;chr2                   | 1                  | 12.252           | LC_526          | chr2:42522656          | TPGKGPK+1nt                            | chr2:29446394             | 2nt+YRRKHQE                               | -                                      |
| 2     | <i>KIF5B</i>   | <i>RET</i>      | chr10;chr10                 | 4                  | 11.227           | LC_52           | chr10:[32317356        | NNDVK                                  | chr10:[43612032           | EDPKWEF                                   | -                                      |
| 2     | <i>KIF5B</i>   | <i>RET</i>      | chr10;chr10                 | 4                  | 11.227           | LC_56           | chr10:[32306980        | KVHKQ                                  | chr10:[43612032           | EDPKWEF                                   | -                                      |
| 2     | <i>KIF5B</i>   | <i>RET</i>      | chr10;chr10                 | 4                  | 11.227           | LC_542          | chr10:[32317356        | NNDVK                                  | chr10:[43612032           | EDPKWEF                                   | -                                      |
| 3     | <i>CD74</i>    | <i>ROS1</i>     | chr5;chr6                   | 1                  | Interchromosomal | LC_539          | chr5:[149784243        | DAPPK+1nt                              | chr6:117645578            | 2nt+DFWIP                                 | -                                      |
| 4     | <i>SLC34A2</i> | <i>ROS1</i>     | chr4;chr6                   | 1                  | Interchromosomal | LC_548          | chr4:25678324          | SREAAQ+1nt                             | chr6:117650609            | 2nt+GVPPNK                                | -                                      |
| 5     | <i>CCDC6</i>   | <i>ROS1</i>     | chr10;chr6                  | 1                  | Interchromosomal | LC_59           | chr10:[61572393        | AAQLQ+1nt                              | chr6:117642557            | 2nt+WHRRLL                                | -                                      |
| 6     | <i>SCAF11</i>  | <i>PDGFRA</i>   | chr12;chr4                  | 1                  | Interchromosomal | LC_538          | chr12:[46384136        | SUTR                                   | chr4:[55124924            | SUTR, in-frame                            | -                                      |
| 7     | <i>FGFR2</i>   | <i>CIT</i>      | chr10;chr12                 | 1                  | Interchromosomal | LC_513          | chr10:[123243212       | LTLTNE                                 | chr12:120180269           | AHRDEIQ                                   | -                                      |
| 8     | <i>AXL</i>     | <i>MBIP</i>     | chr19;chr14                 | 1                  | Interchromosomal | LC_523          | chr19:41765701         | LTAEE                                  | chr14:36783814            | IDRRI                                     | -                                      |
| 9     | <i>APLP2</i>   | <i>TNFSF11</i>  | chr11;chr13                 | 1                  | Interchromosomal | LC_C15          | chr11:130000061        | AAQMKSQ                                | chr13:[43174888           | ELQHIVG                                   | -                                      |
| 10    | <i>MAP4K3</i>  | <i>PRKCE</i>    | chr2;chr2                   | 1                  | 6.215            | LC_526          | chr2:[39664033         | TYGDVYK                                | chr2:[46070139            | IDLEPEGR                                  | EML4-ALK                               |
| 11    | <i>BCAS3</i>   | <i>MAP3K3</i>   | chr17;chr17                 | 1                  | 2.23             | LC_520          | chr17:59161925         | TVIDAAS+1nt                            | chr17:61710041            | 2nt+EQEALNS                               | -                                      |
| 12    | <i>KRAS</i>    | <i>CDH13</i>    | chr12;chr16                 | 1                  | Interchromosomal | LC_C12          | chr12:[25378548        | TSAKTRQ                                | chr16:[83158990           | DIFKFAR                                   | EGFR L858R                             |
| 13    | <i>ZFYVE9</i>  | <i>CGA</i>      | chr1;chr6                   | 1                  | Interchromosomal | LC_C25          | chr1:52803606          | DKNVSK+2nt                             | chr6:87797925             | SUTR, in-frame                            | -                                      |
| 14    | <i>ERBB2IP</i> | <i>MAST4</i>    | chr5;chr5                   | 1                  | 0.515            | LC_519          | chr5:65372777          | QPGDKIIQ                               | chr5:[66400194            | ATAQMEER                                  | -                                      |
| 15    | <i>TPD52L1</i> | <i>TRMT11</i>   | chr6;chr6                   | 1                  | 0.723            | LC_542          | chr6:125569529         | SKKFGDM+2nt                            | chr6:[126342306           | 1nt+YTEEMVP                               | KIF5B-RET                              |
| 16    | <i>TXNRD1</i>  | <i>GPR133</i>   | chr12;chr12                 | 1                  | 26.694           | LC_C17          | chr12:104733051        | IHPVCAE                                | chr12:[131561346          | TRKQHS                                    | MET exon 14 skipping                   |
| 17    | <i>SRSF4</i>   | <i>SNRNP40</i>  | chr1;chr1                   | 1                  | 2.224            | LC_529          | chr1:[29485886         | SRC5WQDLK                              | chr1:31744346             | VWDLRQN                                   | -                                      |
| 18    | <i>EDA</i>     | <i>MID1</i>     | chrX;chrX                   | 1                  | 57.984           | LC_551          | chrX:68836548          | DSQDGHQ                                | chrX:10463731             | VNASRQE                                   | -                                      |
| 19    | <i>HYOU1</i>   | <i>C11orf93</i> | chr11;chr11                 | 1                  | 7.736            | LC_511          | chr11:[118921747       | SGVLSLDR                               | chr11:[111175653          | 5' UTR                                    | -                                      |
| 20    | <i>SLC16A7</i> | <i>MUCL1</i>    | chr12;chr12                 | 1                  | 4.831            | LC_C36          | chr12:60098799         | LAVMYAG+1nt                            | chr12:[55248900           | 2nt+NPPTTAAPAD                            | EGFR microdeletion                     |

**Supplementary Table 7.** List of 43 pairs of primers used for PCR and Sanger sequencing validation of fusion genes.

*Seo\_SuppTable7\_r.xls*

Depicted below is a preview of the full version.

| Index | Donor Gene | Acceptor Gene | Forward Primer Name      | Forward Primer Sequence | Reverse Primer Name      | Reverse Primer Sequence | Remark    |
|-------|------------|---------------|--------------------------|-------------------------|--------------------------|-------------------------|-----------|
| 1     | KIF5B      | RET           | GF1_KIF5B:RET_F          | TAAGGAAATGACCAACCAACAG  | GF1_KIF5B:RET_R          | CCTTGACCACTTTTCCAAATTC  | Validated |
| 2     | KRAS       | CDH13         | GF2_KRAS:CDH13_F         | GGAATAAATGTGATTTGCCTTC  | GF2_KRAS:CDH13_R         | AAGGCTGTCTCTGATTCTCTGG  | Validated |
| 3     | APLP2      | TNFSF11       | GF3_APLP2:TNFSF11_F      | TGCTGAGAACAAAGATCGCTTA  | GF3_APLP2:TNFSF11_R      | TGTCGGTGGCATTAAATGAGAG  | Validated |
| 4     | ZFYVE9     | CGA           | GF4_ZFYVE9:CGA_F         | ACTGCAGAGAACATGGATTCCT  | GF4_ZFYVE9:CGA_R         | GAATGGAGAACATGCAGAAACA  | Validated |
| 5     | CDC6       | ROS1          | GF5_CDC6:ROS1_F          | CCTGCAGAGAAAATTAGACCAG  | GF5_CDC6:ROS1_R          | AGCTCAGCCAACTCTTTGTCTT  | Validated |
| 6     | FGFR2      | CIT           | GF6_FGFR2:CIT_F          | ACATGATGATGAGGGACTGTTG  | GF6_FGFR2:CIT_R          | ACAGCTGTTACGAAGAGCATCA  | Validated |
| 7     | AXL        | MBIP          | GF7_AXL:MBIP_F           | GCCTGACGAAATCCTCTATGTC  | GF7_AXL:MBIP_R           | CAAAATTCCTGACGTTGTTTT   | Validated |
| 8     | SCAF11     | PDGFRA        | GF8_SCAF11:PDGFRA_F      | CAGCGGAGTCAGTGTCTAGAG   | GF8_SCAF11:PDGFRA_R      | TGAGAAGACGCCTAAGACCAG   | Validated |
| 9     | CD74       | ROS1          | GF9_CD74:ROS1_F          | GTCTTTGAGAGCTGGATGCAC   | GF9_CD74:ROS1_R          | AGCTCAGCCAACTCTTTGTCTT  | Validated |
| 10    | SLC34A2    | ROS1          | GF10_SLC34A2:ROS1_F      | ATGCCGTCGTCTCCAAGTTC    | GF10_SLC34A2:ROS1_R      | ATCTTCAGCTTTCTCCCACTGT  | Validated |
| 11    | TXNRD1     | GPR133        | GF11_TXNRD1:GPR133_F     | TCCAAATGCTGGAGAGTTACA   | GF11_TXNRD1:GPR133_R     | AGTACACGAAGACTCGGTGCT   | Validated |
| 12    | EML4       | ALK           | GF12_EML4:ALK_F          | GCCAAATTTGTGCACTGTTTA   | GF12_EML4:ALK_R          | GGAGCTTGCTCAGCTTGACTC   | Validated |
| 13    | HYOU1      | C11orf93      | GF13_HYOU1:C11orf93_F    | CCAGAATCTGACCACTGGAAG   | GF13_HYOU1:C11orf93_R    | AGAAGATGGTGCAACTGGGTCT  | Validated |
| 14    | MAP4K3     | PRKCE         | GF14_MAP4K3:PRKCE_F      | AGGAGGACTTCGAGCTGATTC   | GF14_MAP4K3:PRKCE_R      | ACGACCTGAGAGATCGATGA    | Validated |
| 15    | RBM14      | FGF3          | GF15_RBM14:FGF3_F        | CCAAGGCCTCTTAATCTTGGA   | GF15_RBM14:FGF3_R        | CATAGAGTGTCCCTCTGTGT    | Validated |
| 16    | BCAS3      | MAP3K3        | GF16_BCAS3:MAP3K3_F      | CATCCCGTCCAGTCTCTGAT    | GF16_BCAS3:MAP3K3_R      | CTGCCTATTTGAGTGACCTGTG  | Validated |
| 17    | SRSF4      | SNRNP40       | GF17_SRSF4:SNRNP40_F     | GAAAGTGGCCGAGATAATATGG  | GF17_SRSF4:SNRNP40_R     | TAAACTCAGGCCAGTCACTGAA  | Validated |
| 18    | UBR4       | ATP13A2       | GF18_UBR4:ATP13A2_F      | ACCCCTTCTCTACCTGTGTTGG  | GF18_UBR4:ATP13A2_R      | AGCTGAGGGATCTATTGATGT   | Validated |
| 19    | TTC19      | ATPAF2        | GF19_TTC19:ATPAF2_F      | CGCTTTGATGAGGCCATATTT   | GF19_TTC19:ATPAF2_R      | CTGTGTGATGCTGACATCTGA   | Validated |
| 20    | TPD52L1    | TRMT11        | GF20_TPD52L1:TRMT11_F    | GAAAACACATGAAACCTGAGTC  | GF20_TPD52L1:TRMT11_R    | ATGTGTGACTGGAAGCTCTCTG  | Validated |
| 21    | IGSF3      | MAN1A2        | GF21_IGSF3:MAN1A2_F      | CTGACCAAGGGCGAATCTACT   | GF21_IGSF3:MAN1A2_R      | TCTTGCCTCATGGTCTGTTTTA  | Validated |
| 22    | ERBB2IP    | MAST4         | GF22_ERBB2IP:MAST4_F     | AACAAGGTTACAACCTGAAGGA  | GF22_ERBB2IP:MAST4_R     | TCAAGGAAGTATCGTGAGGTGA  | Validated |
| 23    | XAF1       | FAM64A        | GF23_XAF1:FAM64A_F       | GGAGCTCCACGAGTCTACTGT   | GF23_XAF1:FAM64A_R       | AGAGGTCTCTGATGGCTGAC    | Validated |
| 24    | MIER2      | ITGB1BP3      | GF24_MIER2:ITGB1BP3_F    | AGATCATGTTGGGACCTCAGT   | GF24_MIER2:ITGB1BP3_R    | AGCAGCGAGTTCTGAATGTCTT  | Validated |
| 25    | SLC16A7    | MUCL1         | GF25_SLC16A7:MUCL1_F     | GTGGTTGGAGCAGCTTTATCT   | GF25_SLC16A7:MUCL1_R     | TCATCATCAGCAGGACCAGTAG  | Validated |
| 26    | ITGB1BP3   | DNM2          | GF26_ITGB1BP3:DNM2_F     | CCTGGAAGACATTCAGAACTCG  | GF26_ITGB1BP3:DNM2_R     | TTTGAGAAGATGAGTGCAGAA   | Validated |
| 27    | ARHGEF16   | TCTEX1D4      | GF27_ARHGEF16:TCTEX1D4_F | GCATGGAGCAGATGTACACG    | GF27_ARHGEF16:TCTEX1D4_R | TGTGTTTTGAACAAGTGATCAGA | Validated |
| 28    | CMBL       | C8orf38       | GF29_CMBL:C8orf38_F      | CTCTCCAGGAGGCTACGACT    | GF29_CMBL:C8orf38_R      | TGAGCCAGTCCCACTAAAGG    | Validated |
| 29    | EDA        | MID1          | GF30_EDA:MID1_F          | TGACGTGTGCTGCTACCTAGA   | GF30_EDA:MID1_R          | ATCTGTCTCTTTGCTGAATGA   | Validated |
| 30    | H19        | CALR          | GF28_H19:CALR_F          | CACCGCAATTCATTTAGTAGCA  | GF28_H19:CALR_R          | GCCTCTCTACAGCTCGTCCTT   | Failed    |



**Supplementary Table 8.** Mutually exclusivity of protein tyrosine kinase fusion genes and MET exon 14 skipping with known driver mutations of lung adenocarcinomas.

| Gene1                              | Gene2                                                                                          | wt_wt | mut_wt | wt_mut | mut_mut | Fisher's p-value | Pearson's correlation |
|------------------------------------|------------------------------------------------------------------------------------------------|-------|--------|--------|---------|------------------|-----------------------|
| canonical point driver mutations * | all PTK fusions<br>(EML4-ALK, KIF5B-RET, ROS1 fusions, FGFR2-CIT, AXL-MBIP, and SCAF11-PDGFRA) | 30    | 47     | 10     | 0       | 2.12E-04         | -0.391                |
| canonical driver mutations **      | novel 4 fusions<br>(CCDC6-ROS1, FGFR2-CIT, AXL-MBIP and SCAF11-PDGFRA)                         | 30    | 53     | 4      | 0       | 2.08E-02         | -0.274                |
| canonical driver mutations **      | MET exon 14 skipping                                                                           | 31    | 53     | 3      | 0       | 0.0565           | -0.236                |

--- Note ---

PTK; protein tyrosine kinase

\* Canonical point driver mutations

Total 47 specimens.

EGFR (22), KRAS (18), NRAS (3), BRAF (1), MET (1), CTNNB1 (1), PIK3CA alone (1)

\*\* Canonical driver mutations

Total 53 specimens

Canonical point driver mutations (47), EML4-ALK (1), KIF5B-RET (3), CD74-ROS1 (1) and SLC34A2-ROS1 (1)

**Supplementary Table 9.** List of 17 recurrent exon-skipping events identified from transcriptome sequencing of 87 lung adenocarcinomas.

*Seo\_SuppTable9.xls*

Depicted below is a preview of the full version.

| index | gene           | index        | Upstream Exon | Downstream Exon | # samples observed | Length of Skipped Exon (bp) | Samples observed                                                                                                                                              |
|-------|----------------|--------------|---------------|-----------------|--------------------|-----------------------------|---------------------------------------------------------------------------------------------------------------------------------------------------------------|
| 1     | <i>LMO7</i>    | NM_005358    | 9             | 11              | 23                 | 30                          | LC_C4,LC_C6,LC_C11,LC_C18,LC_C19,LC_C21,LC_C22,LC_C25,LC_C28,LC_C33,LC_S12,LC_S17,LC_S23,LC_S31,LC_S32,LC_S35,LC_S36,LC_S38,LC_S43,LC_S45,LC_S2,LC_S3,LC_S51, |
| 2     | <i>H2AFY</i>   | NM_138609    | 5             | 7               | 5                  | 91                          | LC_C4,LC_C7,LC_S20,LC_S21,LC_S25,                                                                                                                             |
| 3     | <i>MET</i>     | NM_000245    | 13            | 15              | 3                  | 141                         | LC_C15,LC_C17,LC_S4,                                                                                                                                          |
| 4     | <i>FBLN2</i>   | NM_001165035 | 8             | 10              | 3                  | 141                         | LC_C32,LC_S10,LC_S11,                                                                                                                                         |
| 5     | <i>RIPK2</i>   | NM_003821    | 1             | 3               | 3                  | 154                         | LC_S8,LC_S14,LC_S3,                                                                                                                                           |
| 6     | <i>CASK</i>    | NM_001126055 | 17            | 19              | 3                  | 36                          | LC_S38,LC_S45,LC_S51,                                                                                                                                         |
| 7     | <i>CELF2</i>   | NM_001025076 | 5             | 7               | 3                  | 80                          | LC_C18,LC_S6,LC_S10,                                                                                                                                          |
| 8     | <i>WDFY3</i>   | NM_014991    | 44            | 46              | 3                  | 51                          | LC_C21,LC_S27,LC_S43,                                                                                                                                         |
| 9     | <i>SLIT2</i>   | NM_004787    | 14            | 16              | 3                  | 24                          | LC_C22,LC_S42,LC_S3,                                                                                                                                          |
| 10    | <i>OPN3</i>    | NM_014322    | 1             | 3               | 3                  | 320                         | LC_S6,LC_S8,LC_S45,                                                                                                                                           |
| 11    | <i>SLC33A1</i> | NM_001190992 | 1             | 3               | 3                  | 188                         | LC_S6,LC_S9,LC_S9,                                                                                                                                            |
| 12    | <i>EPB41L2</i> | NM_001431    | 12            | 14              | 2                  | 63                          | LC_C4,LC_C21,                                                                                                                                                 |
| 13    | <i>ORC4</i>    | NM_181741    | 4             | 10              | 2                  | 537                         | LC_S8,LC_S10,                                                                                                                                                 |
| 14    | <i>PKD2</i>    | NM_000297    | 5             | 7               | 2                  | 229                         | LC_S9,LC_S27,                                                                                                                                                 |
| 15    | <i>SETDB2</i>  | NM_031915    | 1             | 3               | 2                  | 16                          | LC_S9,LC_S12,                                                                                                                                                 |
| 16    | <i>YME1L1</i>  | NM_014263    | 3             | 5               | 2                  | 99                          | LC_S10,LC_S14,                                                                                                                                                |
| 17    | <i>SLC23A2</i> | NM_005116    | 6             | 8               | 2                  | 89                          | LC_S45,LC_S49,                                                                                                                                                |

**Supplementary Table 10.** Expression map of 87 cancer and 77 adjacent paired-normal tissues represented in RPKM values on all reference genes.

*Seo\_SuppTable10.xls*

*There are two spreadsheets inside, for gene expression levels of cancers and normal tissues..*

Depicted below is a preview of the full version.

| Gene         | index        | chr | start   | stop    | strand | conding<br>length (bp) | LC_C1 | LC_C2 | LC_C3 | LC_C4 | LC_C5 | LC_C6 | LC_C7 | LC_C8 | LC_C9 |
|--------------|--------------|-----|---------|---------|--------|------------------------|-------|-------|-------|-------|-------|-------|-------|-------|-------|
| WASH7P       | NR_024540    | 1   | 14,361  | 29,370  | -      | 1,769                  | 1.83  | 2.13  | 4.26  | 3.26  | 1.43  | 2.67  | 2.82  | 3.13  | 3.39  |
| FAM138A      | NR_026818    | 1   | 34,610  | 36,081  | -      | 1,130                  | 0     | 0     | 0     | 0     | 0     | 0     | 0     | 0     | 0     |
| FAM138F      | NR_026820    | 1   | 34,610  | 36,081  | -      | 1,130                  | 0     | 0     | 0     | 0     | 0     | 0     | 0     | 0     | 0     |
| OR4F5        | NM_001005484 | 1   | 69,090  | 70,008  | +      | 918                    | 0     | 0     | 0     | 0     | 0     | 0     | 0     | 0     | 0     |
| LOC100132287 | NR_028322    | 1   | 323,891 | 328,581 | +      | 4,370                  | 0.05  | 0.02  | 0.04  | 0     | 0.02  | 0.12  | 0.07  | 0.01  | 0.14  |
| LOC100132062 | NR_028325    | 1   | 323,891 | 328,581 | +      | 4,370                  | 0.05  | 0.02  | 0.04  | 0     | 0.02  | 0.12  | 0.07  | 0.01  | 0.14  |
| LOC100133331 | NR_028327    | 1   | 323,891 | 328,581 | +      | 4,273                  | 0.05  | 0.02  | 0.04  | 0     | 0.02  | 0.12  | 0.05  | 0     | 0.13  |
| OR4F29       | NM_001005221 | 1   | 367,658 | 368,597 | +      | 939                    | 0     | 0     | 0     | 0     | 0     | 0     | 0     | 0     | 0     |
| OR4F3        | NM_001005224 | 1   | 367,658 | 368,597 | +      | 939                    | 0     | 0     | 0     | 0     | 0     | 0     | 0     | 0     | 0     |
| OR4F16       | NM_001005277 | 1   | 367,658 | 368,597 | +      | 939                    | 0     | 0     | 0     | 0     | 0     | 0     | 0     | 0     | 0     |
| OR4F29       | NM_001005221 | 1   | 621,095 | 622,034 | -      | 939                    | 0     | 0     | 0     | 0     | 0     | 0     | 0     | 0     | 0     |
| OR4F3        | NM_001005224 | 1   | 621,095 | 622,034 | -      | 939                    | 0     | 0     | 0     | 0     | 0     | 0     | 0     | 0     | 0     |
| OR4F16       | NM_001005277 | 1   | 621,095 | 622,034 | -      | 939                    | 0     | 0     | 0     | 0     | 0     | 0     | 0     | 0     | 0     |
| LOC100133331 | NR_028327    | 1   | 661,138 | 665,731 | -      | 4,273                  | 2.35  | 2.65  | 1.12  | 2.22  | 1.39  | 1.93  | 3.48  | 1.97  | 1.23  |
| LOC100288069 | NR_033908    | 1   | 700,244 | 714,068 | -      | 1,371                  | 2.91  | 2.33  | 0.18  | 2.26  | 1.28  | 1.64  | 3.25  | 1.74  | 1.39  |
| NCRNA00115   | NR_024321    | 1   | 761,585 | 762,902 | -      | 1,317                  | 1.93  | 2.75  | 1.47  | 3.41  | 2.18  | 2.59  | 2.39  | 3.24  | 3.11  |
| LOC643837    | NR_015368    | 1   | 763,063 | 789,740 | +      | 1,543                  | 4.57  | 2.71  | 2.82  | 2.71  | 7.7   | 3.08  | 3.46  | 6.62  | 9.08  |
| FAM41C       | NR_027055    | 1   | 803,450 | 812,182 | -      | 1,706                  | 0.54  | 0.87  | 0.41  | 0.28  | 0.37  | 0.75  | 0.84  | 0.76  | 0.37  |
| FLJ39609     | NR_026874    | 1   | 852,952 | 854,817 | -      | 496                    | 0.21  | 0     | 0.05  | 0     | 0.07  | 0     | 0     | 0.05  | 0.1   |
| SAMD11       | NM_152486    | 1   | 861,120 | 879,961 | +      | 2,554                  | 4.03  | 1.85  | 3.82  | 3.26  | 3.63  | 2.76  | 3.14  | 4.04  | 2.95  |
| NOC2L        | NM_015658    | 1   | 879,582 | 894,679 | -      | 2,800                  | 23.14 | 15.26 | 18.26 | 43.48 | 19.96 | 19.59 | 36.53 | 28.35 | 26.97 |
| KLHL17       | NM_198317    | 1   | 895,966 | 901,099 | +      | 2,564                  | 2.81  | 1.81  | 2.69  | 2.68  | 2.38  | 2.32  | 4.08  | 1.56  | 1.22  |
| PLEKHN1      | NM_001160184 | 1   | 901,876 | 910,484 | +      | 2,295                  | 2.42  | 0.98  | 0.61  | 1.17  | 1.04  | 0.9   | 0.12  | 0.57  | 1.65  |
| PLEKHN1      | NM_032129    | 1   | 901,876 | 910,484 | +      | 2,400                  | 2.48  | 0.96  | 0.64  | 1.2   | 1.09  | 0.91  | 0.13  | 0.61  | 1.71  |
| C1orf170     | NR_027693    | 1   | 910,578 | 917,473 | -      | 3,040                  | 0.54  | 0.2   | 0.35  | 0.23  | 0.23  | 0.14  | 0.02  | 0.12  | 0.26  |

**Supplementary Table 11.** List of 6,719 cancer outlier genes (COGs) identified from transcriptome sequencing of 87 lung adenocarcinomas and 77 adjacent paired-normal tissues.

*Seo\_SuppTable11.xls*

Depicted below is a preview of the full version.

| Gene      | # Samples involved | Outlier score | Average Score (per sample) | is_in_COSMIC (v57) | is_kinase | is_CancerUp (Heatmap) | LC_C1 | LC_C2 | LC_C3 | LC_C4 | LC_C5 | LC_C6 | LC_C7 | LC_C8 | LC_C9 | LC_C10 | LC_C11 | LC_C12 |
|-----------|--------------------|---------------|----------------------------|--------------------|-----------|-----------------------|-------|-------|-------|-------|-------|-------|-------|-------|-------|--------|--------|--------|
| APOA2     | 5                  | 114801.2      | 22960.2                    | 0                  | 0         | 0                     | 0     | 0     | 0     | 0     | 0     | 0     | 0     | 0     | 0     | 0      | 0      | 0      |
| S100A7    | 12                 | 25327.5       | 2110.6                     | 0                  | 0         | 0                     | 0     | 0     | 0     | 0     | 0     | 1     | 0     | 0     | 0     | 0      | 0      | 0      |
| F2        | 4                  | 4033.0        | 1008.3                     | 0                  | 0         | 0                     | 0     | 0     | 0     | 0     | 0     | 0     | 0     | 0     | 0     | 0      | 0      | 0      |
| CRABP1    | 20                 | 16110.7       | 805.5                      | 0                  | 0         | 0                     | 0     | 0     | 0     | 0     | 0     | 0     | 1     | 1     | 0     | 0      | 0      | 0      |
| CALML3    | 8                  | 5521.3        | 690.2                      | 0                  | 0         | 0                     | 0     | 0     | 0     | 0     | 0     | 0     | 1     | 0     | 0     | 0      | 0      | 0      |
| SERPINC1  | 1                  | 531.1         | 531.1                      | 0                  | 0         | 0                     | 0     | 0     | 0     | 0     | 0     | 0     | 0     | 0     | 0     | 0      | 0      | 0      |
| ASCL1     | 8                  | 4014.2        | 501.8                      | 0                  | 0         | 0                     | 0     | 0     | 0     | 0     | 0     | 0     | 0     | 0     | 0     | 0      | 0      | 0      |
| KRT6B     | 15                 | 6409.8        | 427.3                      | 0                  | 0         | 0                     | 0     | 0     | 0     | 1     | 0     | 0     | 1     | 0     | 0     | 0      | 0      | 0      |
| ASGR1     | 1                  | 412.4         | 412.4                      | 0                  | 0         | 0                     | 0     | 0     | 0     | 0     | 0     | 0     | 0     | 0     | 0     | 0      | 0      | 0      |
| DHRS2     | 10                 | 4044.5        | 404.5                      | 0                  | 0         | 0                     | 0     | 0     | 0     | 0     | 0     | 0     | 0     | 0     | 1     | 0      | 0      | 0      |
| DSG3      | 7                  | 2735.0        | 390.7                      | 0                  | 0         | 0                     | 0     | 0     | 0     | 0     | 0     | 0     | 1     | 0     | 0     | 0      | 0      | 0      |
| GSTM1     | 1                  | 378.7         | 378.7                      | 0                  | 0         | 0                     | 0     | 0     | 0     | 0     | 0     | 0     | 0     | 0     | 0     | 0      | 0      | 0      |
| PRAC      | 2                  | 736.7         | 368.4                      | 0                  | 0         | 0                     | 0     | 0     | 0     | 0     | 0     | 0     | 0     | 0     | 0     | 0      | 0      | 0      |
| SERPINA10 | 1                  | 353.9         | 353.9                      | 0                  | 0         | 0                     | 0     | 0     | 0     | 0     | 0     | 0     | 0     | 0     | 0     | 0      | 0      | 0      |
| GUCY2C    | 4                  | 1377.7        | 344.4                      | 0                  | 1         | 0                     | 0     | 0     | 0     | 1     | 0     | 0     | 0     | 0     | 0     | 0      | 0      | 0      |
| VIL1      | 27                 | 9238.4        | 342.2                      | 0                  | 0         | 0                     | 0     | 0     | 0     | 1     | 1     | 1     | 0     | 0     | 0     | 0      | 1      | 0      |
| CDX2      | 12                 | 3811.3        | 317.6                      | 1                  | 0         | 0                     | 0     | 0     | 0     | 1     | 0     | 0     | 0     | 0     | 0     | 0      | 0      | 0      |
| SPRR1B    | 26                 | 7838.0        | 301.5                      | 0                  | 0         | 0                     | 1     | 0     | 0     | 0     | 1     | 0     | 0     | 0     | 0     | 0      | 0      | 0      |
| SERPINA4  | 11                 | 3150.9        | 286.4                      | 0                  | 0         | 0                     | 0     | 0     | 0     | 0     | 0     | 1     | 0     | 0     | 0     | 0      | 0      | 0      |
| GPX2      | 30                 | 8307.1        | 276.9                      | 0                  | 0         | 0                     | 0     | 0     | 0     | 1     | 0     | 0     | 0     | 1     | 0     | 0      | 1      | 0      |
| ANGPTL3   | 3                  | 785.0         | 261.7                      | 0                  | 0         | 0                     | 0     | 0     | 0     | 0     | 0     | 0     | 0     | 0     | 0     | 0      | 0      | 0      |
| PRAP1     | 16                 | 4183.1        | 261.4                      | 0                  | 0         | 0                     | 0     | 0     | 0     | 1     | 0     | 0     | 0     | 0     | 0     | 0      | 0      | 0      |
| SPRR2D    | 20                 | 4715.3        | 235.8                      | 0                  | 0         | 0                     | 1     | 0     | 1     | 0     | 1     | 0     | 0     | 0     | 0     | 0      | 0      | 0      |
| COL11A1   | 18                 | 4183.4        | 232.4                      | 0                  | 0         | 0                     | 1     | 0     | 0     | 0     | 0     | 0     | 0     | 0     | 1     | 1      | 0      | 0      |

**Supplementary Table 12.** Correlation between the lymph node metastasis and somatic mutations in primary lung cancer tissues.

\* Driver mutations: canonical point mutations (n=47; *EGFR*, *KRAS*, *NRAS*, *PIK3CA*, *BRAF*, *MET*, *CTNNB1*), protein tyrosine kinase fusion genes (n=10; *EML4-ALK*, *KIF5B-RET*, *ROS1* fusions, *FGFR2-CIT*, *AXL-MBIP*, *SCAF11-PDGFR*) and *MET* exon 14 skipping (n=3)

**(a) Between cancer tissues with and without canonical driver mutations**

|                                        | with LN mets  | No LN mets    | Subtotals |
|----------------------------------------|---------------|---------------|-----------|
| Driver known cancers<br>(proportion)   | 15<br>(0.250) | 45<br>(0.750) | 60        |
| Driver unknown cancers<br>(proportion) | 3<br>(0.111)  | 24<br>(0.889) | 27        |
| Subtotals                              | 18            | 69            | 87        |

Chi-square *p*-value = 0.2327

<Logistic regression>

LN Mets and TP53 mutation, Driver mutation, Age, Gender, Smoking, Cancer Stage

| Factors         | Estimate  | Std. Error | z-value | P-value  |
|-----------------|-----------|------------|---------|----------|
| TP53 mutation   | 1.85618   | 1.05337    | 1.762   | 0.07847  |
| Driver mutation | 1.49805   | 1.05577    | 1.419   | 0.155925 |
| Age             | 0.05830   | 0.05720    | 1.019   | 0.308099 |
| Gender          | 0.05053   | 1.17829    | 0.043   | 0.965797 |
| Smoking         | 1.26906   | 1.22444    | 1.036   | 0.300000 |
| Cancer stage    | 2.69636   | 0.73290    | 3.679   | 0.000234 |
| (intercept)     | -13.13204 | 5.47495    | -2.399  | 0.016459 |

**(b) Between cancer tissues with a combination of canonical driver and TP53 mutations and other groups**

|                                                           | with LN mets  | No LN mets    | Subtotals |
|-----------------------------------------------------------|---------------|---------------|-----------|
| Cancers with driver and<br>TP53 mutations<br>(proportion) | 7<br>(0.438)  | 9<br>(0.563)  | 16        |
| Others<br>(proportion)                                    | 11<br>(0.155) | 60<br>(0.845) | 71        |
| Subtotals                                                 | 18            | 69            | 87        |

Chi-square *p*-value = 0.012

<Logistic regression>

LN Mets and (TP53 mutation x Driver mutation), Age, Gender, Smoking, Cancer Stage

| Factors            | Estimate  | Std. Error | z-value | P-value   |
|--------------------|-----------|------------|---------|-----------|
| Driver x TP53 mut. | 2.82963   | 1.18588    | 2.386   | 0.017028  |
| Age                | 0.05838   | 0.05910    | 0.988   | 0.323172  |
| Gender             | -0.17579  | 1.16010    | -0.152  | 0.879560  |
| Smoking            | 1.52051   | 1.26227    | 1.205   | 0.228363  |
| Cancer stage       | 2.61576   | 0.69802    | 3.747   | 0.000179  |
| (intercept)        | -12.04942 | 5.12642    | -2.350  | 0.0118751 |

**Supplementary Table 13.** List of specific aberrations of note for 25 cancer tissues which do not harbor canonical driver mutations.

*Seo\_SuppTable13\_r.xls*

Depicted below is a preview of the full version

| Index | Age | Gender | Stage | Smoking_status<br>(0=neverSmoker;<br>1=smoker;2=current_smoker;3=unknown) | #COGs | Length of<br>total JRBs<br>(Mb) | Remarkable<br>gene | type    | Mutation position               | Protein ID         | AminoAcid<br>Change | Prediction<br>(SIFT) | KEGG pathway                               |
|-------|-----|--------|-------|---------------------------------------------------------------------------|-------|---------------------------------|--------------------|---------|---------------------------------|--------------------|---------------------|----------------------|--------------------------------------------|
| LC_C2 | 51  | M      | 2B    |                                                                           | 2     | 67                              | 11.823             | ALK     | overexpression (fusion)         |                    |                     |                      |                                            |
| LC_C6 | 38  | M      | 2B    |                                                                           | 2     | 180                             | 25.547             | EPHA2   | point mutal chr1:16456865,C>T   | ENSP000000: C842Y  |                     | NA                   | Axon guidance                              |
|       |     |        |       |                                                                           |       |                                 |                    | JAK2    | point mutal chr9:5080672,T>G    | ENSP000000: L808W  |                     | N/A                  | Measles;Adipocytokine signaling pathway    |
|       |     |        |       |                                                                           |       |                                 |                    | CDK9    | point mutal chr9:130548447,C>T  | ENSP000000: S7L    |                     | N/A                  | Transcriptional misregulation in cancer    |
|       |     |        |       |                                                                           |       |                                 |                    | MEN1    | point mutal chr11:64572131,C>T  | ENSP000000: G503D  |                     | N/A                  | Transcriptional misregulation in cancer    |
|       |     |        |       |                                                                           |       |                                 |                    | TP53    | point mutal chr17:7577141,C>A   | ENSP000000: G266V  |                     | N/A                  | Measles;Hepatitis C;MAPK signaling pathway |
|       |     |        |       |                                                                           |       |                                 |                    | GNAS    | point mutal chr20:57484420,C>T  | ENSP000000: R186C  |                     | DAMAGING             | Vascular smooth muscle contraction;GnF     |
|       |     |        |       |                                                                           |       |                                 |                    | NEK2    | overexpression                  |                    |                     |                      |                                            |
| LC_C7 | 81  | M      | 1A    |                                                                           | 1     | 740                             | 681.076            | MYCN    | overexpression                  |                    |                     |                      | Transcriptional misregulation in cancer    |
|       |     |        |       |                                                                           |       |                                 |                    | FGFR1   | overexpression                  |                    |                     |                      | Adherens junction;MAPK signaling pathway   |
| LC_C8 | 85  | M      | 1B    |                                                                           | 1     | 463                             | 162.305            | EPHA2   | point mutal chr1:16460020,T>G   | ENSP000000: E607A  |                     | N/A                  | Axon guidance                              |
|       |     |        |       |                                                                           |       |                                 |                    | JAK1    | point mutal chr1:65307187,T>C   | ENSP000000: Q834R  |                     | N/A                  | Measles;Influenza A;Hepatitis C;Leishma    |
|       |     |        |       |                                                                           |       |                                 |                    | NOTCH2  | point mutal chr1:120502080,C>T  | ENSP000000: C654Y  |                     | DAMAGING             | Dorso-ventral axis formation;Notch signa   |
|       |     |        |       |                                                                           |       |                                 |                    | TP53    | point mutal chr17:7577536,T>C   | ENSP000000: R249G  |                     | N/A                  | Measles;Hepatitis C;MAPK signaling pathway |
| LC_C9 | 71  | M      | 1B    |                                                                           | 1     | 389                             | 384.84             | ELK4    | point mutal chr1:205585730,C>A  | ENSP000000: G414W  |                     | DAMAGING             | MAPK signaling pathway;Transcriptional     |
|       |     |        |       |                                                                           |       |                                 |                    | APC     | point mutal chr5:112179479,G>T  | uc011cvt.2 A2712S  |                     | Not scored           | Wnt signaling pathway;HTLV-I infection;F   |
|       |     |        |       |                                                                           |       |                                 |                    | JAK2    | point mutal chr9:5054638,G>T    | ENSP000000: R230S  |                     | DAMAGING             | Measles;Adipocytokine signaling pathway    |
|       |     |        |       |                                                                           |       |                                 |                    | TP53    | point mutal chr17:7577538,C>A   | ENSP000000: R248L  |                     | DAMAGING             | Measles;Hepatitis C;MAPK signaling pathway |
|       |     |        |       |                                                                           |       |                                 |                    | NF1     | point mutal chr17:29665096,G>A  | ENSP000000: G2232E |                     | DAMAGING             | MAPK signaling pathway                     |
|       |     |        |       |                                                                           |       |                                 |                    | SMARCA4 | point mutal chr19:11134270,G>T  | ENSP000000: R979L  |                     | DAMAGING             |                                            |
|       |     |        |       |                                                                           |       |                                 |                    | CHEK1   | point mutal chr11:125499190,T>G | ENSP000000: V118G  |                     | DAMAGING             | Cell cycle;p53 signaling pathway;HTLV-I    |

**Supplementary Table 14.** Three subgroups of genes in differentially expressed gene analysis.

*Seo\_SupTable14.xls*

*There are three spreadsheets inside, for increased abundance in cancers (Cancer-UP), decreased abundance in cancers (Cancer-DOWN) and mixed patterns.*

Depicted below is a preview of the full version.

| Gene symbol | Protein description                                       |
|-------------|-----------------------------------------------------------|
| ABCA7       | ATP-binding cassette sub-family A member 7                |
| ABCB6       | ATP-binding cassette sub-family B member 6, mitochondrial |
| ABCB9       | ATP-binding cassette sub-family B member 9 isoform 5      |
| ABCC3       | ATP-binding cassette, sub-family C (CFTR/MRP)             |
| ABCC4       | multidrug resistance-associated protein 4                 |
| ABHD11      | abhydrolase domain-containing protein 11                  |
| ABL2        | Abelson tyrosine-protein kinase 2 isoform i               |
| ABTB2       | ankyrin repeat and BTB (POZ) domain containing            |
| ACAD8       | acyl-CoA dehydrogenase family, member 8                   |
| ACHE        | uncharacterized protein LOC606473 precursor               |
| ACOT11      | acyl-coenzyme A thioesterase 11                           |
| ADAM28      | ADAM metalloproteinase domain 28 precursor                |
| ADAM8       | a disintegrin and metalloproteinase domain 8 precursor    |
| ADAMDEC1    | ADAM DEC1 precursor                                       |
| ADCK4       | aarF domain containing kinase 4                           |
| ADCK5       | aarF domain containing kinase 5                           |

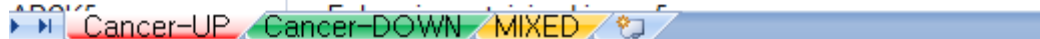

## References

1. Ju, Y.S. et al. A transforming KIF5B and RET gene fusion in lung adenocarcinoma revealed from whole-genome and transcriptome sequencing. *Genome Res* **22**, 436-45 (2012).
2. Mortazavi, A., Williams, B.A., McCue, K., Schaeffer, L. & Wold, B. Mapping and quantifying mammalian transcriptomes by RNA-Seq. *Nat Methods* **5**, 621-8 (2008).
3. Forbes, S.A. et al. COSMIC: mining complete cancer genomes in the Catalogue of Somatic Mutations in Cancer. *Nucleic Acids Res* **39**, D945-50 (2011).
4. Manning, G., Whyte, D.B., Martinez, R., Hunter, T. & Sudarsanam, S. The protein kinase complement of the human genome. *Science* **298**, 1912-34 (2002).
5. Altshuler, D.M. et al. Integrating common and rare genetic variation in diverse human populations. *Nature* **467**, 52-8 (2010).
6. Ju, Y.S. et al. Extensive genomic and transcriptional diversity identified through massively parallel DNA and RNA sequencing of eighteen Korean individuals. *Nat Genet* **43**, 745-52 (2011).
